# Supplementary material for: Bioinformatic analysis of SERINC2 with the prognosis and immune infiltration of stomach adenocarcinomas
Source: Research Square preprint supplement (doi:10.21203/rs.3.rs-1519982/v1), 2022-04-07
Supplement: Supplementary file 1 [file 205e68fd6bcc98dea8182581.xlsx]

## Sheet: Sheet1
Table S2 Co-expression genes of SERINC2
Query	Statistic	P-value	FDR (BH)	Event_SD	Event_TD
A1BG	-0.121348	0.0133711	0.0290443	415	415
A1CF	0.151853	0.00192108	0.00525479	415	384
A2BP1	-0.086465	0.0785079	0.132453	415	241
A2LD1	0.170574	0.000483048	0.00154877	415	415
A2ML1	0.135512	0.00569171	0.0137205	415	324
A2M	-0.178182	0.000264162	0.000909858	415	415
A4GALT	-0.0443627	0.367346	0.469855	415	415
A4GNT	0.0274907	0.576541	0.666469	415	359
AAA1	-0.00953413	0.846455	0.889437	415	285
AAAS	-0.00293371	0.952487	0.967702	415	415
AACSL	-0.0348705	0.478673	0.578291	415	280
AACS	0.251382	2.11243e-07	1.63193e-06	415	415
AADACL2	-0.0992105	0.0433874	0.0798898	415	129
AADACL3	0.106421	0.0301899	0.0586342	415	106
AADACL4	-0.0304521	0.536161	0.629687	415	108
AADAC	0.152931	0.00178144	0.00492276	415	401
AADAT	-0.118418	0.0157968	0.0335248	415	415
AAGAB	0.142559	0.00361121	0.00923347	415	415
AAK1	-0.142016	0.00374277	0.0095361	415	415
AAMP	0.210613	1.51712e-05	7.23163e-05	415	415
AANAT	-0.124638	0.0110432	0.0245007	415	325
AARS2	0.0480719	0.328613	0.429813	415	415
AARSD1	-0.13548	0.00570315	0.0137435	415	415
AARS	0.0430895	0.38127	0.484128	415	415
AASDHPPT	-0.219625	6.30604e-06	3.311e-05	415	415
AASDH	-0.213363	1.16513e-05	5.7016e-05	415	415
AASS	-0.151442	0.00197698	0.00538656	415	415
AATF	0.133454	0.00647599	0.0153405	415	415
AATK	0.19776	4.97787e-05	0.00020754	415	415
ABAT	0.0295177	0.548747	0.641037	415	415
ABCA10	-0.0705361	0.151463	0.229773	415	412
ABCA11P	-0.0219212	0.656121	0.736039	415	415
ABCA12	0.101469	0.0388116	0.0725609	415	399
ABCA13	0.165322	0.000722215	0.00220947	415	407
ABCA17P	-0.124344	0.0112357	0.0248786	415	380
ABCA1	-0.313433	6.52661e-11	1.29159e-09	415	415
ABCA2	0.0235888	0.631827	0.714612	415	415
ABCA3	-0.174519	0.000354328	0.00117731	415	415
ABCA4	-0.0468274	0.341304	0.442843	415	387
ABCA5	-0.0613332	0.21245	0.302485	415	415
ABCA6	-0.218125	7.31728e-06	3.7657e-05	415	414
ABCA7	0.0621049	0.206742	0.295878	415	415
ABCA8	-0.158587	0.00118921	0.00344679	415	407
ABCA9	-0.198248	4.76492e-05	0.000199856	415	412
ABCB10	-0.135206	0.00580262	0.0139496	415	415
ABCB11	0.0278009	0.572244	0.662563	415	302
ABCB1	-0.16674	0.000648635	0.00201206	415	415
ABCB4	-0.154616	0.00158161	0.00442863	415	414
ABCB5	-0.0960846	0.0504634	0.0909888	415	345
ABCB6	0.203866	2.8572e-05	0.000126809	415	415
ABCB7	-0.119022	0.0152669	0.0325608	415	415
ABCB8	0.195462	6.10812e-05	0.000248865	415	415
ABCB9	0.230182	2.14978e-06	1.27993e-05	415	415
ABCC10	0.1662	0.000675803	0.00208305	415	415
ABCC11	0.0265956	0.589022	0.677258	415	351
ABCC12	0.066956	0.173384	0.256318	415	131
ABCC13	0.194106	6.88463e-05	0.000276712	415	295
ABCC1	0.00538854	0.912851	0.93985	415	415
ABCC2	0.0716696	0.144981	0.221719	415	412
ABCC3	0.485547	6.18903e-26	4.81435e-23	415	415
ABCC4	-0.148003	0.002506	0.00666629	415	415
ABCC5	-0.057031	0.246355	0.341152	415	415
ABCC6P1	0.151505	0.00196841	0.00536682	415	403
ABCC6P2	0.164163	0.000788017	0.00238838	415	412
ABCC6	0.113473	0.0207715	0.0424048	415	415
ABCC8	-0.133445	0.00647968	0.015347	415	312
ABCC9	-0.290266	1.68545e-09	2.31421e-08	415	415
ABCD1	0.111202	0.0234783	0.0471548	415	415
ABCD2	-0.404143	9.75447e-18	1.04938e-15	415	407
ABCD3	0.1239	0.0115319	0.0254592	415	415
ABCD4	-0.00432609	0.929985	0.951958	415	415
ABCE1	-0.0890905	0.0698251	0.119964	415	415
ABCF1	0.13139	0.00735824	0.0171789	415	415
ABCF2	-0.126569	0.00985108	0.0221548	415	415
ABCF3	0.17687	0.000293658	0.000997185	415	415
ABCG1	0.0225581	0.646798	0.727881	415	415
ABCG2	0.0695081	0.15753	0.237146	415	415
ABCG4	-0.0619347	0.207991	0.297413	415	410
ABCG5	0.210436	1.54285e-05	7.33605e-05	415	406
ABCG8	0.210595	1.51965e-05	7.24199e-05	415	347
ABHD10	-0.010676	0.828335	0.875978	415	415
ABHD11	0.367466	1.02952e-14	5.56738e-13	415	415
ABHD12B	-0.0628508	0.20133	0.28963	415	311
ABHD12	0.28319	4.2992e-09	5.28579e-08	415	415
ABHD13	-0.0324488	0.509759	0.60657	415	415
ABHD14A	0.0943656	0.0547489	0.0975506	415	415
ABHD14B	0.253078	1.73835e-07	1.37468e-06	415	415
ABHD15	0.211471	1.39774e-05	6.71799e-05	415	415
ABHD1	-0.00427248	0.93085	0.952659	415	407
ABHD2	0.187679	0.00012006	0.000453871	415	415
ABHD3	0.321914	1.84537e-11	4.2268e-10	415	415
ABHD4	0.109827	0.0252626	0.0502149	415	415
ABHD5	-0.1268	0.0097162	0.0218904	415	415
ABHD6	0.0708387	0.149711	0.227491	415	415
ABHD8	-0.0255369	0.603941	0.690448	415	415
ABI1	0.0757548	0.123365	0.194123	415	415
ABI2	-0.387506	2.5567e-16	2.00423e-14	415	415
ABI3BP	-0.269094	2.57148e-08	2.53204e-07	415	415
ABI3	-0.230793	2.01689e-06	1.2108e-05	415	415
ABL1	-0.300477	4.1661e-10	6.70321e-09	415	415
ABL2	-0.237156	1.02615e-06	6.65187e-06	415	415
ABLIM1	0.264962	4.26187e-08	3.95541e-07	415	415
ABLIM2	0.185643	0.000142638	0.000527973	415	415
ABLIM3	0.0733882	0.135559	0.209763	415	415
ABO	0.138509	0.00470215	0.011608	415	415
ABP1	0.338404	1.40997e-12	4.39394e-11	415	415
ABRA	-0.102031	0.0377377	0.0708944	415	373
ABR	0.0896014	0.0682303	0.117659	415	415
ABT1	0.02908	0.554692	0.646497	415	415
ABTB1	0.236403	1.1127e-06	7.12617e-06	415	415
ABTB2	0.161639	0.000950945	0.00282214	415	415
ACAA1	0.361793	2.79949e-14	1.32599e-12	415	415
ACAA2	0.135599	0.00566046	0.0136571	415	415
ACACA	0.0655711	0.182469	0.267539	415	415
ACACB	-0.135242	0.00578971	0.0139268	415	415
ACAD10	0.177821	0.000271993	0.000932068	415	415
ACAD11	-0.327098	8.36014e-12	2.09004e-10	415	415
ACAD8	-0.0195629	0.691101	0.764716	415	415
ACAD9	-0.00515507	0.916613	0.942428	415	415
ACADL	-0.000446083	0.992771	0.99538	415	352
ACADM	-0.0707066	0.150474	0.22853	415	415
ACADSB	-0.171133	0.000462487	0.0014916	415	415
ACADS	0.25317	1.71987e-07	1.36249e-06	415	415
ACADVL	0.228094	2.67071e-06	1.55843e-05	415	415
ACAN	-0.0256069	0.602949	0.689664	415	415
ACAP1	-0.294368	9.67737e-10	1.40809e-08	415	415
ACAP2	-0.187778	0.000119047	0.000450295	415	415
ACAP3	0.142608	0.00359946	0.00920809	415	415
ACAT1	-0.276378	1.03333e-08	1.13274e-07	415	415
ACAT2	0.182649	0.000183193	0.000658214	415	415
ACBD3	0.108565	0.0270008	0.0532098	415	415
ACBD4	-0.00963644	0.844828	0.888541	415	415
ACBD5	0.224006	4.06022e-06	2.26387e-05	415	415
ACBD6	0.0305777	0.53448	0.628188	415	415
ACBD7	0.0174154	0.723537	0.791516	415	415
ACCN1	-0.0537182	0.274916	0.372437	415	349
ACCN2	-0.0126466	0.797284	0.852322	415	415
ACCN3	-0.0476178	0.333208	0.434391	415	411
ACCN4	0.0227441	0.644085	0.725552	415	355
ACCN5	-0.0306255	0.533841	0.627547	415	85
ACCSL	0.0224857	0.647855	0.728584	415	63
ACCS	-0.07983	0.104387	0.168373	415	415
ACD	0.0422825	0.39026	0.493282	415	415
ACE2	0.115646	0.018438	0.0383216	415	408
ACER1	0.00856948	0.861826	0.90131	415	175
ACER2	0.202256	3.31302e-05	0.000144565	415	415
ACER3	0.0183937	0.708695	0.779537	415	415
ACE	0.202646	3.19669e-05	0.000140154	415	415
ACHE	0.207107	2.11341e-05	9.70566e-05	415	415
ACIN1	-0.12464	0.0110421	0.0245007	415	415
ACLY	0.00193423	0.968664	0.97875	415	415
ACMSD	0.186872	0.000128577	0.000482641	415	243
ACN9	0.100064	0.0416067	0.0770176	415	415
ACO1	-0.0448066	0.362568	0.465228	415	415
ACO2	0.058543	0.234033	0.327656	415	415
ACOT11	0.440658	3.83331e-21	8.24773e-19	415	415
ACOT12	-0.0391339	0.426545	0.528543	415	77
ACOT13	-0.0452859	0.357451	0.459566	415	415
ACOT1	-0.16312	0.000851924	0.00255792	415	410
ACOT2	-0.145608	0.00294735	0.00769959	415	415
ACOT4	0.194458	6.67486e-05	0.000269537	415	415
ACOT6	-0.0376854	0.443875	0.545306	415	327
ACOT7	0.0814523	0.0975074	0.158988	415	415
ACOT8	0.249359	2.6607e-07	1.99528e-06	415	415
ACOT9	-0.178717	0.000252932	0.000876102	415	415
ACOX1	0.213635	1.13497e-05	5.57154e-05	415	415
ACOX2	-0.0706062	0.151056	0.229259	415	414
ACOX3	0.044619	0.364582	0.467132	415	415
ACOXL	-0.0712954	0.147097	0.224209	415	400
ACP1	0.072012	0.143065	0.219336	415	415
ACP2	0.0515906	0.294405	0.393129	415	415
ACP5	-0.0351831	0.474737	0.574806	415	415
ACP6	0.260958	6.89747e-08	6.07584e-07	415	415
ACPL2	0.038692	0.431789	0.533407	415	415
ACPP	0.167721	0.000601883	0.0018835	415	414
ACPT	-0.0344283	0.484271	0.58352	415	167
ACRBP	0.0939788	0.0557539	0.0990446	415	415
ACRC	-0.0866836	0.0777533	0.131494	415	414
ACRV1	0.00641262	0.896375	0.927608	415	390
ACR	-0.114363	0.0197863	0.040685	415	351
ACSBG1	-0.0898634	0.067424	0.116531	415	412
ACSBG2	-0.0762476	0.120937	0.19091	415	356
ACSF2	0.159211	0.00113645	0.00330877	415	415
ACSF3	0.0964065	0.0496928	0.0898583	415	415
ACSL1	-0.0953895	0.0521612	0.0935581	415	415
ACSL3	0.102629	0.0366243	0.0690204	415	415
ACSL4	-0.202116	3.3557e-05	0.000146112	415	415
ACSL5	0.224581	3.82977e-06	2.14741e-05	415	415
ACSL6	-0.195998	5.82505e-05	0.000238775	415	394
ACSM1	0.0178361	0.717142	0.78605	415	390
ACSM2A	-0.0364191	0.459348	0.5604	415	209
ACSM2B	-0.025527	0.604081	0.690568	415	135
ACSM3	0.171207	0.000459815	0.00148456	415	414
ACSM4	-0.00150822	0.975563	0.983587	415	43
ACSM5	-0.300776	3.99595e-10	6.44483e-09	415	373
ACSS1	0.184296	0.000159718	0.000583929	415	415
ACSS2	0.315277	4.97576e-11	1.01344e-09	415	415
ACSS3	-0.122167	0.0127544	0.0278241	415	413
ACTA1	-0.304641	2.31898e-10	3.98129e-09	415	367
ACTA2	-0.195938	5.85603e-05	0.000239802	415	415
ACTBL2	0.119212	0.0151041	0.0322544	415	368
ACTB	-0.0112673	0.818988	0.868727	415	415
ACTC1	-0.0470121	0.339401	0.440901	415	409
ACTG1	0.143144	0.0034743	0.00891497	415	415
ACTG2	-0.216724	8.39944e-06	4.24591e-05	415	415
ACTL6A	0.0849467	0.0839162	0.139987	415	415
ACTL6B	-0.155705	0.00146354	0.00413467	415	112
ACTL7A	0.0995566	0.042658	0.078683	415	121
ACTL7B	0.0541563	0.271015	0.368143	415	129
ACTL8	0.10179	0.0381954	0.0715942	415	331
ACTL9	0.0734245	0.135365	0.209581	415	66
ACTN1	-0.161616	0.000952534	0.00282561	415	415
ACTN2	-0.215221	9.7292e-06	4.86099e-05	415	360
ACTN3	-0.13784	0.00490826	0.0120663	415	249
ACTN4	0.250705	2.28266e-07	1.74544e-06	415	415
ACTR10	-0.182566	0.000184457	0.000661813	415	415
ACTR1A	-0.0319797	0.515901	0.612006	415	415
ACTR1B	0.0425469	0.3873	0.490307	415	415
ACTR2	-0.0435177	0.376551	0.479491	415	415
ACTR3B	-0.0268131	0.585977	0.674524	415	415
ACTR3C	0.182231	0.000189642	0.000678013	415	415
ACTR3	0.00542135	0.912323	0.939459	415	415
ACTR5	0.108509	0.0270804	0.0533405	415	415
ACTR6	-0.155974	0.00143568	0.00406449	415	415
ACTR8	-0.268684	2.7047e-08	2.64519e-07	415	415
ACTRT1	0.0946544	0.0540084	0.0963925	415	42
ACTRT2	-0.0825852	0.0929211	0.152655	415	35
ACVR1B	0.221198	5.38926e-06	2.89237e-05	415	415
ACVR1C	0.0842839	0.0863696	0.143474	415	415
ACVR1	0.0412179	0.402314	0.505328	415	415
ACVR2A	-0.021503	0.662271	0.740925	415	415
ACVR2B	-0.165166	0.000730781	0.00223297	415	415
ACVRL1	-0.122907	0.0122188	0.026777	415	415
ACY1	0.469575	3.78719e-24	1.66513e-21	415	415
ACY3	0.256135	1.21893e-07	1.00788e-06	415	415
ACYP1	0.107134	0.0290955	0.05677	415	415
ACYP2	-0.0525112	0.285862	0.384201	415	415
ADAD1	0.0533027	0.278651	0.376166	415	55
ADAD2	0.0355171	0.470551	0.570796	415	270
ADAL	-0.103961	0.0342431	0.0652442	415	415
ADAM10	-0.0362568	0.461352	0.562573	415	415
ADAM11	-0.229255	2.36781e-06	1.39604e-05	415	408
ADAM12	-0.0971688	0.0479072	0.0870238	415	415
ADAM15	0.327461	7.90436e-12	1.98838e-10	415	415
ADAM17	-0.0808752	0.0999121	0.162203	415	415
ADAM18	0.0441975	0.369135	0.471591	415	64
ADAM19	-0.332914	3.3771e-12	9.35641e-11	415	415
ADAM20	-0.0515151	0.295112	0.393866	415	342
ADAM21P1	-0.081104	0.0989534	0.160982	415	227
ADAM21	-0.0890979	0.0698016	0.119934	415	370
ADAM22	-0.217884	7.49295e-06	3.84632e-05	415	411
ADAM23	-0.218087	7.34495e-06	3.77705e-05	415	411
ADAM28	-0.000151582	0.997544	0.998426	415	415
ADAM29	-0.083391	0.0897656	0.148229	415	159
ADAM2	0.0982953	0.045367	0.0830284	415	47
ADAM30	0.108735	0.026761	0.0528195	415	139
ADAM32	-0.0106187	0.829243	0.876526	415	379
ADAM33	-0.152041	0.00189613	0.00519708	415	414
ADAM3A	0.0656493	0.181947	0.266928	415	32
ADAM5P	0.0491934	0.317442	0.417551	415	80
ADAM6	-0.0903176	0.066045	0.1145	415	415
ADAM7	0.125377	0.0105724	0.0235985	415	45
ADAM8	0.182207	0.000190017	0.000678993	415	415
ADAM9	0.161995	0.000926213	0.00275676	415	415
ADAMDEC1	-0.250513	2.33304e-07	1.77925e-06	415	415
ADAMTS10	-0.1172	0.0169132	0.0355472	415	414
ADAMTS12	-0.110756	0.0240447	0.0481728	415	415
ADAMTS13	-0.024749	0.615153	0.699824	415	415
ADAMTS14	0.0511221	0.298816	0.39776	415	415
ADAMTS15	-0.0791588	0.107343	0.172248	415	412
ADAMTS16	-0.0490277	0.319076	0.419401	415	411
ADAMTS17	0.0668164	0.174284	0.25746	415	415
ADAMTS18	-0.154672	0.00157531	0.00441284	415	406
ADAMTS19	-0.099631	0.0425026	0.0784463	415	223
ADAMTS1	-0.272256	1.73664e-08	1.78836e-07	415	415
ADAMTS20	0.0280436	0.568894	0.659552	415	181
ADAMTS2	-0.112058	0.0224245	0.0453434	415	415
ADAMTS3	-0.202088	3.3643e-05	0.000146392	415	415
ADAMTS4	-0.172132	0.00042774	0.00139353	415	415
ADAMTS5	-0.237369	1.00287e-06	6.51766e-06	415	415
ADAMTS6	-0.126964	0.00962143	0.0217107	415	415
ADAMTS7	-0.0576576	0.241194	0.335615	415	415
ADAMTS8	-0.196976	5.33912e-05	0.00022078	415	413
ADAMTS9	-0.0625834	0.203259	0.291802	415	415
ADAMTSL1	-0.215755	9.23586e-06	4.63504e-05	415	415
ADAMTSL2	-0.0146766	0.765628	0.825681	415	415
ADAMTSL3	-0.278698	7.68633e-09	8.75316e-08	415	415
ADAMTSL4	-0.0654643	0.183184	0.268373	415	415
ADAMTSL5	0.369473	7.19225e-15	4.0746e-13	415	415
ADAP1	0.44222	2.68234e-21	6.0278e-19	415	415
ADAP2	-0.281347	5.46288e-09	6.51839e-08	415	415
ADARB1	-0.364445	1.75808e-14	8.86711e-13	415	415
ADARB2	-0.0762195	0.121074	0.191067	415	359
ADAR	-0.144981	0.00307397	0.00799113	415	415
ADAT1	-0.0835272	0.0892408	0.147507	415	415
ADAT2	-0.0764567	0.119917	0.189493	415	415
ADAT3	0.373941	3.20708e-15	1.95961e-13	415	415
ADA	-0.116626	0.0174632	0.0365372	415	415
ADCK1	0.224677	3.79252e-06	2.13034e-05	415	415
ADCK2	0.0286343	0.560779	0.651938	415	415
ADCK4	0.133807	0.00633495	0.0150487	415	415
ADCK5	0.290869	1.55425e-09	2.14803e-08	415	415
ADCY10	0.0312625	0.525363	0.620175	415	342
ADCY1	-0.166047	0.000683687	0.00210401	415	415
ADCY2	-0.210353	1.5551e-05	7.38654e-05	415	410
ADCY3	-0.157281	0.00130711	0.00374877	415	415
ADCY4	-0.161062	0.000992273	0.00292974	415	415
ADCY5	-0.150804	0.00206664	0.00560594	415	414
ADCY6	-0.0132975	0.787095	0.843882	415	415
ADCY7	-0.150414	0.00212323	0.00574711	415	415
ADCY8	-0.177977	0.000268574	0.000923325	415	125
ADCY9	-0.0737135	0.13383	0.207554	415	415
ADCYAP1R1	-0.284536	3.60471e-09	4.52266e-08	415	214
ADCYAP1	-0.195055	6.33234e-05	0.000256966	415	387
ADC	-0.125612	0.0104269	0.0232943	415	414
ADD1	-0.243724	5.00708e-07	3.49683e-06	415	415
ADD2	-0.330747	4.74466e-12	1.26597e-10	415	407
ADD3	-0.0106696	0.828436	0.87601	415	415
ADH1A	-0.0111539	0.820779	0.870125	415	254
ADH1B	-0.164014	0.000796875	0.00241269	415	406
ADH1C	0.0833162	0.0900546	0.148585	415	402
ADH4	0.0425553	0.387206	0.490249	415	367
ADH5	-0.215714	9.27237e-06	4.65113e-05	415	415
ADH6	0.11604	0.0180405	0.0375998	415	406
ADH7	0.110202	0.024764	0.049379	415	200
ADHFE1	-0.282252	4.85787e-09	5.87622e-08	415	414
ADI1	0.104015	0.0341486	0.0650824	415	415
ADIG	0.100172	0.0413875	0.0766599	415	14
ADIPOQ	-0.163048	0.000856481	0.0025697	415	235
ADIPOR1	0.284072	3.83108e-09	4.7741e-08	415	415
ADIPOR2	0.105962	0.0309135	0.0598072	415	415
ADK	0.141681	0.00382594	0.00971009	415	415
ADM2	0.393304	8.36379e-17	7.22896e-15	415	415
ADM	0.164808	0.000750732	0.00228737	415	415
ADNP2	-0.148313	0.0024534	0.006541	415	415
ADNP	-0.125303	0.010619	0.0236973	415	415
ADORA1	-0.0538877	0.273402	0.37093	415	415
ADORA2A	-0.286534	2.77091e-09	3.56953e-08	415	415
ADORA2B	0.258395	9.34749e-08	7.98028e-07	415	415
ADORA3	-0.217461	7.81264e-06	3.99117e-05	415	415
ADO	-0.164094	0.000792103	0.00239968	415	415
ADPGK	-0.0820119	0.0952203	0.155938	415	415
ADPRHL1	0.284552	3.59717e-09	4.51601e-08	415	415
ADPRHL2	0.145147	0.00304002	0.0079161	415	415
ADPRH	-0.293993	1.01848e-09	1.47134e-08	415	415
ADRA1A	-0.221714	5.11783e-06	2.76908e-05	415	375
ADRA1B	-0.0789671	0.1082	0.173471	415	400
ADRA1D	-0.0417571	0.396181	0.499206	415	412
ADRA2A	0.15644	0.00138859	0.00394829	415	415
ADRA2B	-0.0681328	0.165932	0.247253	415	415
ADRA2C	0.0259028	0.598765	0.68612	415	413
ADRB1	0.0898854	0.0673568	0.116455	415	415
ADRB2	-0.172019	0.00043154	0.00140433	415	414
ADRB3	-0.193031	7.5654e-05	0.000301498	415	348
ADRBK1	0.151108	0.00202344	0.00550203	415	415
ADRBK2	-0.2903	1.67779e-09	2.30525e-08	415	415
ADRM1	0.256164	1.2147e-07	1.00603e-06	415	415
ADSL	-0.140413	0.00415663	0.010438	415	415
ADSSL1	0.126679	0.00978666	0.0220344	415	415
ADSS	0.108801	0.0266686	0.0526679	415	415
AEBP1	-0.0601446	0.221462	0.313331	415	415
AEBP2	-0.198776	4.54387e-05	0.000191458	415	415
AEN	-0.10474	0.032913	0.0631022	415	415
AES	0.0974493	0.0472637	0.0860119	415	415
AFAP1L1	-0.18464	0.000155174	0.000569066	415	415
AFAP1L2	0.0384368	0.434835	0.536458	415	415
AFAP1	-0.141034	0.00399165	0.0100725	415	415
AFARP1	0.051415	0.296053	0.394861	415	408
AFF1	-0.239292	8.1441e-07	5.39164e-06	415	415
AFF2	-0.202429	3.26081e-05	0.000142656	415	412
AFF3	-0.235474	1.22916e-06	7.7893e-06	415	415
AFF4	-0.22587	3.35747e-06	1.91227e-05	415	415
AFG3L1	-0.035344	0.472717	0.572772	415	415
AFG3L2	0.193882	7.02189e-05	0.000281669	415	415
AFMID	0.225155	3.61206e-06	2.0389e-05	415	415
AFM	-0.0326946	0.506557	0.60343	415	59
AFP	0.0066115	0.89318	0.925249	415	176
AFTPH	0.0989019	0.0440467	0.080927	415	415
AG2	-0.109219	0.026087	0.0516707	415	415
AGAP11	-0.0426855	0.385755	0.488626	415	412
AGAP1	-0.01992	0.685758	0.760012	415	415
AGAP2	-0.186246	0.00013557	0.000505141	415	415
AGAP3	0.172433	0.000417762	0.00136476	415	415
AGAP4	-0.131485	0.00731541	0.0170907	415	415
AGAP5	-0.0922612	0.0604029	0.105963	415	415
AGAP6	-0.103076	0.0358104	0.0677327	415	415
AGAP7	-0.094105	0.0554242	0.0985542	415	414
AGAP8	-0.0918949	0.0614347	0.10755	415	415
AGA	0.017952	0.715382	0.784547	415	415
AGBL1	0.00382148	0.938134	0.957623	415	188
AGBL2	-0.0383621	0.43573	0.53714	415	414
AGBL3	-0.0720421	0.142898	0.21913	415	402
AGBL4	-0.0348167	0.479352	0.578834	415	315
AGBL5	-0.0447661	0.363002	0.465667	415	415
AGER	-0.189255	0.000104934	0.000402865	415	415
AGFG1	0.141796	0.00379733	0.00964837	415	415
AGFG2	0.14507	0.0030557	0.00795489	415	415
AGGF1	-0.167432	0.000615339	0.00191997	415	415
AGK	-0.14326	0.0034477	0.00885906	415	415
AGL	-0.149767	0.00222041	0.00597974	415	415
AGMAT	0.241983	6.06838e-07	4.15199e-06	415	415
AGPAT1	0.0561998	0.253318	0.349026	415	415
AGPAT2	0.455667	1.14687e-22	3.26695e-20	415	415
AGPAT3	0.120754	0.013834	0.0299178	415	415
AGPAT4	-0.0605023	0.218722	0.31004	415	415
AGPAT5	-0.0361553	0.462609	0.563732	415	415
AGPAT6	0.0718358	0.144048	0.220644	415	415
AGPAT9	0.262563	5.69226e-08	5.13354e-07	415	415
AGPHD1	0.162679	0.000880367	0.00263472	415	415
AGPS	-0.0652921	0.184341	0.269632	415	415
AGR2	0.319809	2.53447e-11	5.54758e-10	415	415
AGR3	0.255048	1.38364e-07	1.12703e-06	415	406
AGRN	0.295468	8.32718e-10	1.22511e-08	415	415
AGRP	0.0865916	0.0780702	0.131867	415	282
AGTPBP1	-0.234682	1.33752e-06	8.39581e-06	415	415
AGTR1	-0.277218	9.28602e-09	1.03476e-07	415	390
AGTR2	-0.2691	2.5696e-08	2.53142e-07	415	171
AGTRAP	0.296817	6.91956e-10	1.03435e-08	415	415
AGT	0.0401863	0.414204	0.516669	415	415
AGXT2L1	-0.0296862	0.546467	0.638824	415	204
AGXT2L2	0.00695166	0.887719	0.920771	415	415
AGXT2	0.0418801	0.39479	0.497918	415	148
AGXT	0.203049	3.08043e-05	0.000135616	415	326
AHCTF1	-0.111615	0.0229645	0.046279	415	415
AHCYL1	0.0228662	0.642307	0.723919	415	415
AHCYL2	0.128442	0.00880504	0.0201268	415	415
AHCY	0.0884886	0.0717427	0.122675	415	415
AHDC1	0.0223559	0.649752	0.73023	415	415
AHI1	-0.186608	0.000131485	0.000491824	415	415
AHNAK2	0.00353118	0.942826	0.960831	415	415
AHNAK	-0.0704921	0.151719	0.230025	415	415
AHRR	-0.0534786	0.277066	0.374402	415	415
AHR	0.132929	0.00669079	0.0157901	415	415
AHSA1	0.0302683	0.538626	0.631775	415	415
AHSA2	-0.0465375	0.344305	0.446135	415	415
AHSG	-0.0230435	0.639728	0.721773	415	261
AHSP	-0.0285735	0.561612	0.652544	415	219
AICDA	-0.111759	0.0227883	0.0459836	415	333
AIDA	-0.0752072	0.126108	0.1977	415	415
AIF1L	-0.0600427	0.222247	0.314275	415	415
AIF1	-0.304092	2.50653e-10	4.24933e-09	415	415
AIFM1	0.0929978	0.0583712	0.103007	415	415
AIFM2	0.29894	5.16005e-10	7.99333e-09	415	415
AIFM3	0.132433	0.0068999	0.0162325	415	413
AIG1	0.0724271	0.140768	0.216455	415	415
AIM1L	0.459844	4.18583e-23	1.36247e-20	415	414
AIM1	0.042296	0.390109	0.493122	415	415
AIM2	-0.270103	2.26997e-08	2.26941e-07	415	414
AIMP1	0.0445861	0.364937	0.467408	415	415
AIMP2	0.177094	0.000288409	0.00098195	415	415
AIPL1	-0.0848279	0.0843517	0.140563	415	199
AIP	0.00572438	0.907444	0.936046	415	415
AIRE	-0.0428498	0.383926	0.486798	415	273
AJAP1	-0.12805	0.0090157	0.0205341	415	411
AK1	0.191138	8.92054e-05	0.000348095	415	415
AK2	0.131636	0.00724805	0.0169549	415	415
AK3L1	0.0376753	0.443997	0.545389	415	415
AK3	-0.137255	0.00509564	0.0124754	415	415
AK5	-0.084546	0.0853927	0.14211	415	402
AK7	0.23844	8.93287e-07	5.87536e-06	415	414
AKAP10	-0.303585	2.69269e-10	4.50919e-09	415	415
AKAP11	-0.247676	3.21893e-07	2.35461e-06	415	415
AKAP12	-0.157277	0.0013075	0.00374935	415	415
AKAP13	0.000136042	0.997795	0.998585	415	415
AKAP14	-0.0552763	0.261214	0.357349	415	195
AKAP1	0.149867	0.00220505	0.00594313	415	415
AKAP2	-0.275851	1.10481e-08	1.20198e-07	415	415
AKAP3	-0.163854	0.000806493	0.00243744	415	413
AKAP4	0.00432621	0.929983	0.951958	415	227
AKAP5	-0.269799	2.35705e-08	2.34257e-07	415	415
AKAP6	-0.230563	2.066e-06	1.23697e-05	415	415
AKAP7	-0.0152603	0.756594	0.818601	415	415
AKAP8L	-0.0113294	0.818007	0.868051	415	415
AKAP8	-0.0408262	0.406804	0.509823	415	415
AKAP9	0.0198873	0.686247	0.760417	415	415
AKD1	-0.0401662	0.414438	0.516866	415	415
AKIRIN1	-0.175412	0.000330038	0.00110459	415	415
AKIRIN2	-0.138991	0.00455829	0.0113035	415	415
AKNAD1	0.0445222	0.365625	0.468082	415	306
AKNA	-0.227754	2.7662e-06	1.60627e-05	415	415
AKR1A1	0.188585	0.000111126	0.000423023	415	415
AKR1B10	0.2736	1.46766e-08	1.538e-07	415	409
AKR1B15	0.183661	0.000168407	0.000611168	415	249
AKR1B1	-0.184244	0.000160414	0.000586263	415	415
AKR1C1	0.248605	2.89833e-07	2.14878e-06	415	414
AKR1C2	0.293818	1.04294e-09	1.5056e-08	415	415
AKR1C3	0.346693	3.6484e-13	1.32001e-11	415	415
AKR1C4	0.263374	5.16355e-08	4.69994e-07	415	364
AKR1CL1	-0.0160297	0.744738	0.809248	415	146
AKR1D1	-0.0563865	0.251742	0.347281	415	217
AKR1E2	0.0918093	0.061678	0.107947	415	411
AKR7A2	0.312455	7.53078e-11	1.46378e-09	415	415
AKR7A3	0.366701	1.17955e-14	6.26153e-13	415	415
AKR7L	0.308669	1.30401e-10	2.37172e-09	415	413
AKT1S1	0.216266	8.78552e-06	4.42889e-05	415	415
AKT1	0.133519	0.00644983	0.0152857	415	415
AKT2	-0.0755222	0.124524	0.195629	415	415
AKT3	-0.318477	3.09374e-11	6.6494e-10	415	415
AKTIP	-0.13674	0.0052657	0.0128327	415	415
ALAD	0.114415	0.0197297	0.0405851	415	415
ALAS1	0.171053	0.000465393	0.00149953	415	415
ALAS2	0.0253975	0.605918	0.69212	415	291
ALB	0.0753231	0.125523	0.196951	415	293
ALCAM	-0.079723	0.104854	0.168964	415	415
ALDH16A1	0.0900236	0.0669351	0.115865	415	415
ALDH18A1	0.209481	1.6895e-05	7.94839e-05	415	415
ALDH1A1	0.0476189	0.333197	0.434391	415	415
ALDH1A2	-0.131972	0.00709916	0.016649	415	401
ALDH1A3	-0.0509352	0.300589	0.399593	415	415
ALDH1B1	-0.273152	1.55245e-08	1.61763e-07	415	415
ALDH1L1	-0.0373951	0.447395	0.548777	415	391
ALDH1L2	-0.0953223	0.0523279	0.0938155	415	415
ALDH2	0.208873	1.78969e-05	8.36138e-05	415	415
ALDH3A1	0.254365	1.49777e-07	1.20488e-06	415	414
ALDH3A2	0.0728939	0.138219	0.213298	415	415
ALDH3B1	0.440144	4.30942e-21	8.98535e-19	415	415
ALDH3B2	0.168559	0.000564414	0.00177919	415	401
ALDH4A1	0.183907	0.000164984	0.000600791	415	415
ALDH5A1	-0.0553491	0.260586	0.356586	415	415
ALDH6A1	-0.0934677	0.0571051	0.101152	415	415
ALDH7A1	0.0424537	0.388342	0.49138	415	415
ALDH8A1	-0.110874	0.0238943	0.0479	415	399
ALDH9A1	0.0706031	0.151074	0.229269	415	415
ALDOA	0.271801	1.83828e-08	1.88059e-07	415	415
ALDOB	0.113703	0.0205124	0.0419436	415	411
ALDOC	0.176237	0.000308968	0.001042	415	415
ALG10B	0.00756955	0.877814	0.913496	415	415
ALG10	-0.112663	0.0217041	0.044095	415	415
ALG11	0.0803078	0.102322	0.165531	415	415
ALG12	0.220252	5.92436e-06	3.13748e-05	415	415
ALG13	-0.0363324	0.460418	0.56157	415	415
ALG14	0.25582	1.26455e-07	1.04008e-06	415	415
ALG1L2	-0.0267875	0.586335	0.674705	415	237
ALG1L	0.275121	1.21183e-08	1.3023e-07	415	375
ALG1	0.278198	8.19426e-09	9.25342e-08	415	415
ALG2	0.0627011	0.202408	0.290853	415	415
ALG3	0.349431	2.31386e-13	8.86324e-12	415	415
ALG5	0.171046	0.000465635	0.00150008	415	415
ALG6	0.120225	0.0142588	0.0307019	415	415
ALG8	0.140048	0.0042566	0.0106494	415	415
ALG9	-0.14719	0.00264847	0.00700199	415	415
ALKBH1	-0.0836873	0.0886271	0.146655	415	415
ALKBH2	-0.00290603	0.952935	0.96806	415	415
ALKBH3	-0.0745699	0.129359	0.201983	415	415
ALKBH4	0.14604	0.0028628	0.0075009	415	415
ALKBH5	-0.130479	0.00778097	0.018045	415	415
ALKBH6	0.106255	0.0304506	0.0590491	415	415
ALKBH7	0.155403	0.00149541	0.00421646	415	415
ALKBH8	-0.212673	1.24538e-05	6.06206e-05	415	415
ALK	-0.269501	2.4454e-08	2.42324e-07	415	342
ALLC	-0.087768	0.0740953	0.126164	415	205
ALMS1P	-0.0811733	0.0986644	0.160616	415	317
ALMS1	-0.259506	8.19656e-08	7.09351e-07	415	415
ALOX12B	0.0723129	0.141397	0.217191	415	356
ALOX12P2	0.14295	0.00351911	0.00901394	415	356
ALOX12	0.0256499	0.602341	0.689163	415	413
ALOX15B	-0.126867	0.00967769	0.0218182	415	411
ALOX15	-0.0403743	0.412022	0.514678	415	374
ALOX5AP	-0.159078	0.00114752	0.00333743	415	415
ALOX5	0.029922	0.543284	0.635801	415	415
ALOXE3	0.123338	0.0119161	0.0261845	415	395
ALPI	0.218254	7.2245e-06	3.72364e-05	415	377
ALPK1	-0.0701889	0.153492	0.232103	415	415
ALPK2	-0.263195	5.27565e-08	4.78905e-07	415	415
ALPK3	-0.21497	9.96999e-06	4.97025e-05	415	415
ALPL	-0.0926925	0.0592063	0.104217	415	415
ALPPL2	0.25518	1.36249e-07	1.11114e-06	415	377
ALPP	0.256708	1.1399e-07	9.51865e-07	415	357
ALS2CL	0.42735	7.46534e-20	1.16144e-17	415	415
ALS2CR11	-0.0402081	0.413951	0.516417	415	370
ALS2CR12	-0.131517	0.00730129	0.0170617	415	352
ALS2CR4	-0.214324	1.06159e-05	5.24864e-05	415	415
ALS2CR8	-0.192024	8.25999e-05	0.00032565	415	415
ALS2	-0.0195286	0.691615	0.764993	415	415
ALX1	0.0719907	0.143183	0.219501	415	135
ALX3	-0.0672373	0.17158	0.254135	415	415
ALX4	-0.131872	0.00714325	0.0167388	415	232
AMAC1L2	-0.0736318	0.134262	0.208129	415	370
AMAC1L3	-0.163369	0.000836256	0.00251836	415	297
AMAC1	0.0236176	0.63141	0.71422	415	162
AMACR	0.0746402	0.128997	0.201574	415	415
AMBN	-0.0552699	0.261269	0.357401	415	94
AMBP	0.22477	3.7569e-06	2.11417e-05	415	397
AMBRA1	-0.00933065	0.849693	0.891916	415	415
AMD1	-0.105518	0.0316271	0.0609838	415	415
AMDHD1	-0.0980296	0.0459556	0.0839689	415	409
AMDHD2	0.0257271	0.601248	0.688303	415	415
AMELX	0.00646484	0.895536	0.927072	415	189
AMELY	-0.0457065	0.352998	0.455022	415	27
AMFR	0.0650653	0.185874	0.271459	415	415
AMHR2	-0.0716484	0.1451	0.221834	415	263
AMH	-0.0310948	0.527588	0.622221	415	409
AMICA1	-0.252739	1.80753e-07	1.42302e-06	415	415
AMIGO1	0.016695	0.734534	0.800946	415	415
AMIGO2	-0.0133434	0.786377	0.843384	415	415
AMIGO3	0.0919744	0.0612094	0.10721	415	415
AMMECR1L	-0.031569	0.521308	0.616757	415	415
AMMECR1	0.152095	0.00188896	0.00517812	415	415
AMN1	-0.00168737	0.972661	0.981591	415	415
AMN	0.394424	6.72378e-17	5.99069e-15	415	415
AMOTL1	-0.266137	3.69447e-08	3.49979e-07	415	415
AMOTL2	-0.03483	0.479184	0.578746	415	415
AMOT	-0.040914	0.405795	0.508848	415	415
AMPD1	-0.0604098	0.219428	0.310758	415	346
AMPD2	0.136034	0.00550705	0.0133262	415	415
AMPD3	-0.0934132	0.0572509	0.101357	415	415
AMPH	-0.152391	0.00185015	0.00508677	415	415
AMTN	0.152706	0.00180981	0.0049882	415	159
AMT	-0.00689334	0.888655	0.921553	415	415
AMY1A	-0.0559974	0.255034	0.35065	415	195
AMY2A	-0.0477855	0.331506	0.432897	415	144
AMY2B	-0.0876537	0.0744741	0.126745	415	413
AMZ1	-0.216705	8.41532e-06	4.25189e-05	415	413
AMZ2P1	-0.261567	6.41358e-08	5.70676e-07	415	415
AMZ2	-0.0266122	0.588789	0.677067	415	415
ANAPC10	-0.0949476	0.0532653	0.0952765	415	415
ANAPC11	0.175791	0.000320198	0.00107496	415	415
ANAPC13	-0.00726375	0.882714	0.917132	415	415
ANAPC16	0.0438227	0.373213	0.476049	415	415
ANAPC1	-0.119303	0.0150266	0.0321295	415	415
ANAPC2	0.0340947	0.488518	0.587249	415	415
ANAPC4	-0.218451	7.08471e-06	3.65905e-05	415	415
ANAPC5	-0.0144245	0.769539	0.828971	415	415
ANAPC7	-0.00302608	0.950993	0.966913	415	415
ANGEL1	-0.189228	0.00010517	0.000403616	415	415
ANGEL2	-0.213316	1.17044e-05	5.7262e-05	415	415
ANGPT1	-0.269868	2.33703e-08	2.32496e-07	415	415
ANGPT2	-0.0438689	0.372708	0.475525	415	415
ANGPT4	-0.040429	0.411389	0.513982	415	264
ANGPTL1	-0.260811	7.01941e-08	6.1725e-07	415	415
ANGPTL2	-0.170094	0.000501381	0.00160171	415	415
ANGPTL3	0.0511894	0.29818	0.397122	415	360
ANGPTL4	0.0855242	0.0818246	0.137097	415	415
ANGPTL5	-0.140425	0.0041535	0.0104327	415	260
ANGPTL6	-0.136734	0.00526775	0.0128346	415	411
ANGPTL7	-0.275455	1.16161e-08	1.25567e-07	415	391
ANG	0.226302	3.21216e-06	1.83987e-05	415	415
ANK1	-0.0894258	0.0687751	0.118477	415	415
ANK2	-0.28948	1.87267e-09	2.55049e-08	415	415
ANK3	-0.0467832	0.341761	0.443312	415	415
ANKAR	-0.119881	0.0145413	0.0312406	415	415
ANKDD1A	-0.328632	6.59501e-12	1.69953e-10	415	415
ANKFN1	0.140838	0.00404306	0.0101819	415	308
ANKFY1	-0.210889	1.47766e-05	7.0685e-05	415	415
ANKHD1-EIF4EBP3	-0.115813	0.0182685	0.0380086	415	415
ANKHD1	-0.138534	0.00469435	0.0115926	415	415
ANKH	-0.0154163	0.754185	0.816694	415	415
ANKIB1	-0.0622546	0.205647	0.294625	415	415
ANKK1	0.064469	0.189947	0.276281	415	388
ANKLE1	-0.222497	4.73005e-06	2.58835e-05	415	413
ANKLE2	0.0259561	0.598013	0.685513	415	415
ANKMY1	-0.0359951	0.464595	0.565301	415	415
ANKMY2	-0.0390796	0.427188	0.529047	415	415
ANKRA2	-0.0713122	0.147001	0.224115	415	415
ANKRD10	-0.0133027	0.787014	0.84384	415	415
ANKRD11	0.0483836	0.325483	0.426216	415	415
ANKRD12	-0.160286	0.00105055	0.0030829	415	415
ANKRD13A	-0.196551	5.5453e-05	0.000228552	415	415
ANKRD13B	0.0129224	0.792963	0.849048	415	415
ANKRD13C	-0.000394593	0.993606	0.995772	415	415
ANKRD13D	0.0365661	0.457537	0.55873	415	415
ANKRD16	0.00403592	0.93467	0.955263	415	415
ANKRD17	-0.0699404	0.154957	0.23402	415	415
ANKRD19	-0.0879502	0.0734946	0.125278	415	415
ANKRD1	0.00392323	0.936491	0.956399	415	336
ANKRD20A3	-0.0867685	0.0774616	0.13109	415	398
ANKRD20A4	-0.0597787	0.22429	0.31669	415	311
ANKRD20B	-0.0618936	0.208293	0.297729	415	392
ANKRD22	0.180536	0.000218053	0.000766976	415	415
ANKRD23	-0.0869429	0.0768655	0.13018	415	415
ANKRD24	-0.0750316	0.126997	0.198971	415	415
ANKRD26P1	-0.0356007	0.469506	0.569802	415	206
ANKRD26	-0.101083	0.0395639	0.073722	415	415
ANKRD27	-0.102765	0.036375	0.0686018	415	415
ANKRD28	-0.0856076	0.0815262	0.136643	415	415
ANKRD29	-0.0929358	0.0585402	0.103242	415	413
ANKRD2	-0.0528133	0.283095	0.381172	415	282
ANKRD30A	0.0095461	0.846265	0.889358	415	106
ANKRD30B	-0.0767656	0.118424	0.187456	415	190
ANKRD31	-0.103532	0.0349953	0.0664208	415	326
ANKRD32	-0.332575	3.56221e-12	9.8155e-11	415	415
ANKRD33	0.14842	0.00243561	0.00649968	415	276
ANKRD34A	-0.28441	3.66491e-09	4.58681e-08	415	415
ANKRD34B	-0.0415117	0.398965	0.501964	415	246
ANKRD34C	-0.0864297	0.0786304	0.132635	415	232
ANKRD35	-0.0621832	0.206169	0.295281	415	414
ANKRD36BP1	-0.140078	0.00424824	0.0106311	415	415
ANKRD36B	-0.130318	0.00785785	0.0182045	415	415
ANKRD36	-0.167823	0.00059721	0.00186975	415	415
ANKRD37	0.00570691	0.907725	0.936279	415	415
ANKRD39	0.139294	0.0044698	0.0111099	415	415
ANKRD40	-0.307513	1.53967e-10	2.74799e-09	415	415
ANKRD42	-0.0315649	0.521362	0.616785	415	415
ANKRD43	0.236067	1.15355e-06	7.35051e-06	415	414
ANKRD44	-0.367713	9.85088e-15	5.44356e-13	415	415
ANKRD45	0.0314365	0.523059	0.618286	415	403
ANKRD46	0.0188806	0.701348	0.773138	415	415
ANKRD49	-0.0472458	0.337003	0.438574	415	415
ANKRD50	-0.139919	0.00429237	0.010723	415	415
ANKRD52	-0.0289675	0.556226	0.647798	415	415
ANKRD53	-0.200264	3.97245e-05	0.000169679	415	414
ANKRD54	0.0598871	0.22345	0.315724	415	415
ANKRD55	-0.212401	1.27839e-05	6.20007e-05	415	385
ANKRD56	0.389286	1.8187e-16	1.46547e-14	415	414
ANKRD57	0.215604	9.37244e-06	4.69551e-05	415	415
ANKRD58	-0.00407364	0.934061	0.954898	415	415
ANKRD5	0.168267	0.000577246	0.00181455	415	415
ANKRD6	-0.140794	0.00405471	0.0102087	415	415
ANKRD7	-0.155682	0.00146598	0.004141	415	180
ANKRD9	0.391332	1.22616e-16	1.02054e-14	415	415
ANKS1A	-0.157692	0.00126891	0.00365371	415	415
ANKS1B	-0.281128	5.6205e-09	6.67496e-08	415	407
ANKS3	0.0356956	0.468321	0.568672	415	415
ANKS4B	0.22333	4.34818e-06	2.40739e-05	415	410
ANKS6	0.115549	0.0185379	0.0384898	415	415
ANKZF1	0.120622	0.0139394	0.0301202	415	415
ANLN	0.148244	0.002465	0.00656932	415	415
ANO10	0.167107	0.000630763	0.00196295	415	415
ANO1	0.211939	1.33638e-05	6.45529e-05	415	415
ANO2	-0.0287207	0.559597	0.650788	415	409
ANO3	0.105385	0.0318435	0.0613776	415	348
ANO4	-0.0349298	0.477925	0.577665	415	350
ANO5	-0.0587239	0.232588	0.326111	415	413
ANO6	-0.274495	1.31139e-08	1.39103e-07	415	415
ANO7	0.254519	1.47127e-07	1.18883e-06	415	415
ANO8	0.0955776	0.0516971	0.0928738	415	415
ANO9	0.268285	2.84071e-08	2.76617e-07	415	415
ANP32A	-0.0127616	0.795481	0.850798	415	415
ANP32B	-0.0387609	0.430969	0.532752	415	415
ANP32C	-0.0239253	0.626971	0.710352	415	354
ANP32D	-0.0676933	0.168686	0.250601	415	59
ANP32E	-0.0455495	0.354656	0.456873	415	415
ANPEP	0.0894525	0.0686918	0.118369	415	415
ANTXR1	-0.107345	0.0287787	0.0562313	415	415
ANTXR2	-0.0530755	0.280708	0.378387	415	415
ANTXRL	0.0269363	0.584256	0.673118	415	52
ANUBL1	-0.164965	0.000741952	0.002263	415	415
ANXA10	0.252174	1.92903e-07	1.50636e-06	415	400
ANXA11	0.36628	1.27109e-14	6.64313e-13	415	415
ANXA13	0.198646	4.59754e-05	0.000193518	415	409
ANXA1	0.112338	0.0220886	0.0447896	415	415
ANXA2P1	0.0923733	0.0600901	0.105524	415	415
ANXA2P2	0.306795	1.70637e-10	3.00883e-09	415	415
ANXA2P3	-0.000461673	0.992519	0.995235	415	370
ANXA2	0.367198	1.07976e-14	5.79259e-13	415	415
ANXA3	0.312542	7.43594e-11	1.45026e-09	415	415
ANXA4	0.31188	8.18978e-11	1.57003e-09	415	415
ANXA5	0.0764505	0.119948	0.189527	415	415
ANXA6	-0.298582	5.42243e-10	8.35888e-09	415	415
ANXA7	-0.0772186	0.116261	0.184523	415	415
ANXA8L1	0.0504832	0.304904	0.404161	415	32
ANXA8L2	0.206348	2.26908e-05	0.000103361	415	402
ANXA8	0.172441	0.000417503	0.00136413	415	401
ANXA9	0.307873	1.46213e-10	2.62393e-09	415	415
AOAH	-0.311985	8.06502e-11	1.55052e-09	415	414
AOC2	-0.198891	4.49702e-05	0.000189919	415	415
AOC3	-0.228893	2.45854e-06	1.44547e-05	415	415
AOX1	-0.248415	2.96115e-07	2.19098e-06	415	413
AOX2P	-0.0296208	0.547351	0.639784	415	30
AP1AR	0.0859132	0.0804399	0.135079	415	415
AP1B1	0.0656357	0.182038	0.267023	415	415
AP1G1	0.0544932	0.268041	0.364911	415	415
AP1G2	0.245266	4.2177e-07	3.00574e-06	415	415
AP1M1	-0.157424	0.00129367	0.00371655	415	415
AP1M2	0.42162	2.57554e-19	3.69434e-17	415	415
AP1S1	0.252092	1.94718e-07	1.51819e-06	415	415
AP1S2	-0.454431	1.54127e-22	4.29194e-20	415	415
AP1S3	0.406028	6.65956e-18	7.36008e-16	415	415
AP2A1	0.12055	0.0139962	0.0302203	415	415
AP2A2	0.00295872	0.952082	0.967486	415	415
AP2B1	0.0652238	0.184802	0.270215	415	415
AP2M1	0.0155076	0.752776	0.815813	415	415
AP2S1	0.233831	1.46421e-06	9.09892e-06	415	415
AP3B1	-0.0612565	0.213023	0.303194	415	415
AP3B2	-0.219761	6.22144e-06	3.27252e-05	415	373
AP3D1	0.0929208	0.058581	0.103278	415	415
AP3M1	-0.132684	0.00679334	0.0160097	415	415
AP3M2	-0.163034	0.000857422	0.00257176	415	415
AP3S1	-0.0389328	0.428927	0.530713	415	415
AP3S2	-0.0158736	0.747138	0.811323	415	415
AP4B1	0.0102555	0.834998	0.880813	415	415
AP4E1	-0.236383	1.11511e-06	7.13705e-06	415	415
AP4M1	0.219421	6.43552e-06	3.37185e-05	415	415
AP4S1	-0.320663	2.22902e-11	4.95952e-10	415	415
APAF1	-0.0480211	0.329125	0.430316	415	415
APBA1	-0.0473706	0.335727	0.437196	415	415
APBA2	-0.147282	0.00263209	0.00696326	415	415
APBA3	0.0165887	0.736161	0.802172	415	415
APBB1IP	-0.181936	0.000194325	0.000693282	415	415
APBB1	-0.203389	2.98555e-05	0.000131811	415	415
APBB2	-0.248419	2.95978e-07	2.19098e-06	415	415
APBB3	-0.248982	2.77716e-07	2.07109e-06	415	415
APC2	-0.149633	0.00224102	0.00603266	415	414
APCDD1L	-0.0800213	0.103556	0.167299	415	409
APCDD1	-0.0754234	0.125019	0.196269	415	415
APCS	0.0849583	0.0838739	0.13994	415	26
APC	-0.193671	7.15305e-05	0.000286533	415	415
APEH	0.211296	1.42128e-05	6.81819e-05	415	415
APEX1	0.00583454	0.905671	0.934868	415	415
APEX2	0.237243	1.01657e-06	6.60247e-06	415	415
APH1A	0.268005	2.93989e-08	2.8463e-07	415	415
APH1B	-0.176588	0.000300396	0.00101716	415	415
API5	-0.101775	0.0382243	0.0716286	415	415
APIP	-0.125776	0.0103263	0.0231105	415	415
APITD1	0.17598	0.000315393	0.00106172	415	415
APLF	-0.14893	0.00235191	0.00629865	415	415
APLNR	-0.127461	0.00933983	0.0211627	415	415
APLN	0.0405541	0.409941	0.512553	415	415
APLP1	0.00574638	0.907089	0.935758	415	414
APLP2	0.0631421	0.199246	0.287306	415	415
APOA1BP	0.255891	1.25414e-07	1.03236e-06	415	415
APOA1	0.148378	0.00244261	0.0065148	415	408
APOA2	-0.0124481	0.800398	0.854837	415	258
APOA4	0.129631	0.00819391	0.0188857	415	300
APOA5	0.13021	0.00790999	0.0183169	415	287
APOB48R	-0.0752665	0.125809	0.197292	415	415
APOBEC1	0.196655	5.49451e-05	0.000226696	415	382
APOBEC2	-0.0834482	0.0895449	0.147949	415	410
APOBEC3A	-0.0734433	0.135265	0.209442	415	410
APOBEC3B	0.0524885	0.28607	0.384413	415	415
APOBEC3C	-0.249574	2.59655e-07	1.95297e-06	415	415
APOBEC3D	-0.234429	1.37401e-06	8.60202e-06	415	415
APOBEC3F	-0.279098	7.30156e-09	8.39057e-08	415	415
APOBEC3G	-0.338109	1.47847e-12	4.57919e-11	415	415
APOBEC3H	-0.313123	6.83008e-11	1.34507e-09	415	407
APOBEC4	0.126275	0.0100249	0.0225156	415	368
APOB	-0.0445264	0.365579	0.468053	415	395
APOC1P1	-0.0340916	0.488558	0.587249	415	185
APOC1	-0.107081	0.0291757	0.056897	415	415
APOC2	-0.0545537	0.267509	0.364286	415	415
APOC3	0.124652	0.011034	0.0244885	415	249
APOC4	-0.00813221	0.868811	0.906552	415	221
APOD	-0.0786167	0.109779	0.175654	415	415
APOE	-0.144288	0.00321981	0.00831787	415	415
APOF	0.0254794	0.604757	0.691106	415	220
APOH	-0.00212563	0.965565	0.976671	415	300
APOL1	0.0251295	0.609727	0.695255	415	415
APOL2	-0.103806	0.0345139	0.0656858	415	415
APOL3	-0.205186	2.52831e-05	0.000113583	415	415
APOL4	-0.0671865	0.171905	0.254484	415	414
APOL5	0.0465489	0.344187	0.446029	415	142
APOL6	-0.133425	0.00648775	0.0153629	415	415
APOLD1	-0.222871	4.5547e-06	2.50323e-05	415	415
APOM	0.0793852	0.106339	0.171016	415	415
APOOL	-0.0105577	0.830208	0.877363	415	415
APOO	0.0521218	0.289455	0.387954	415	415
APPBP2	-0.248362	2.97902e-07	2.20215e-06	415	415
APPL1	-0.256833	1.1233e-07	9.39178e-07	415	415
APPL2	0.266613	3.48646e-08	3.32611e-07	415	415
APP	0.0271304	0.58155	0.670841	415	415
APRT	0.36332	2.14279e-14	1.05189e-12	415	415
APTX	0.0322946	0.511774	0.60836	415	415
AQP10	0.159259	0.00113243	0.00329985	415	328
AQP11	0.19254	7.89726e-05	0.000313426	415	415
AQP12A	0.00620532	0.899707	0.93037	415	175
AQP12B	0.117225	0.0168902	0.0355098	415	349
AQP1	-0.147106	0.00266362	0.00703285	415	415
AQP2	0.171877	0.000436361	0.00141796	415	348
AQP3	0.204856	2.60709e-05	0.000116759	415	415
AQP4	-0.173013	0.00039916	0.00131119	415	269
AQP5	0.2546	1.45747e-07	1.17815e-06	415	402
AQP6	0.125992	0.0101944	0.0228558	415	388
AQP7P1	-0.0986493	0.0445924	0.081825	415	383
AQP7P3	-0.178974	0.000247721	0.000859819	415	182
AQP7	0.143687	0.00335127	0.00862882	415	406
AQP8	-0.0477194	0.332177	0.433438	415	226
AQP9	-0.0397437	0.419369	0.52176	415	415
AQPEP	-0.133724	0.00636793	0.0151199	415	371
AQR	-0.171388	0.000453385	0.00146645	415	415
ARAF	0.0981364	0.0457182	0.0835804	415	415
ARAP1	-0.0679204	0.167259	0.248816	415	415
ARAP2	0.0046482	0.924787	0.948325	415	415
ARAP3	0.0268265	0.58579	0.674386	415	415
ARCN1	0.0195628	0.691102	0.764716	415	415
ARC	-0.0162294	0.74167	0.806726	415	407
AREG	0.250847	2.24585e-07	1.7225e-06	415	415
ARF1	0.331479	4.23108e-12	1.14762e-10	415	415
ARF3	-0.0817777	0.096172	0.157229	415	415
ARF4	0.127017	0.00959141	0.0216575	415	415
ARF5	0.239907	7.61651e-07	5.07669e-06	415	415
ARF6	0.10829	0.0273927	0.0538771	415	415
ARFGAP1	0.155793	0.00145443	0.00411238	415	415
ARFGAP2	0.0164718	0.737952	0.803547	415	415
ARFGAP3	0.144055	0.00327022	0.0084384	415	415
ARFGEF1	0.0683717	0.164449	0.245532	415	415
ARFGEF2	0.0702089	0.153375	0.232006	415	415
ARFIP1	0.0976405	0.0468293	0.0853341	415	415
ARFIP2	0.283462	4.14907e-09	5.11989e-08	415	415
ARFRP1	0.0861836	0.0794883	0.133777	415	415
ARG1	-0.103416	0.035201	0.0667225	415	314
ARG2	-0.0615047	0.211172	0.301004	415	415
ARGFXP2	-0.0400573	0.415705	0.518158	415	410
ARGFX	0.00611894	0.901096	0.931493	415	211
ARGLU1	-0.099622	0.0425214	0.0784714	415	415
ARHGAP10	-0.224246	3.96231e-06	2.2162e-05	415	415
ARHGAP11A	0.0433166	0.378763	0.481609	415	415
ARHGAP11B	-0.0147255	0.76487	0.825083	415	415
ARHGAP12	0.189378	0.000103829	0.000399381	415	415
ARHGAP15	-0.363191	2.19174e-14	1.07332e-12	415	415
ARHGAP17	-0.103557	0.0349515	0.0663563	415	415
ARHGAP18	0.0743137	0.130684	0.203644	415	415
ARHGAP19	-0.238957	8.44649e-07	5.56813e-06	415	415
ARHGAP1	0.0390507	0.427529	0.52934	415	415
ARHGAP20	-0.274927	1.24182e-08	1.32748e-07	415	415
ARHGAP21	0.0987877	0.0442926	0.0813344	415	415
ARHGAP22	-0.209998	1.60861e-05	7.60471e-05	415	415
ARHGAP23	-0.0568248	0.24807	0.343034	415	415
ARHGAP24	-0.153206	0.00174733	0.00483898	415	415
ARHGAP25	-0.343034	6.65923e-13	2.25978e-11	415	415
ARHGAP26	0.114751	0.0193695	0.0399947	415	415
ARHGAP27	0.388676	2.04458e-16	1.64094e-14	415	415
ARHGAP28	-0.160841	0.00100856	0.00297132	415	415
ARHGAP29	-0.119349	0.0149873	0.0320557	415	415
ARHGAP30	-0.30255	3.1159e-10	5.16973e-09	415	415
ARHGAP31	-0.273405	1.504e-08	1.57283e-07	415	415
ARHGAP32	0.286912	2.6357e-09	3.4259e-08	415	415
ARHGAP33	-0.13698	0.00518563	0.0126702	415	415
ARHGAP36	-0.0766373	0.119043	0.188317	415	188
ARHGAP39	0.202043	3.37805e-05	0.000146832	415	415
ARHGAP42	0.088706	0.0710454	0.121637	415	415
ARHGAP4	-0.0902898	0.0661286	0.114626	415	415
ARHGAP5	-0.0759098	0.122597	0.193094	415	415
ARHGAP6	-0.0550293	0.263355	0.359645	415	415
ARHGAP8	0.327974	7.30262e-12	1.85314e-10	415	415
ARHGAP9	-0.320968	2.12884e-11	4.78397e-10	415	415
ARHGDIA	0.279765	6.70178e-09	7.80331e-08	415	415
ARHGDIB	-0.282739	4.55923e-09	5.55151e-08	415	415
ARHGDIG	0.0749227	0.127551	0.199669	415	337
ARHGEF10L	0.140421	0.00415455	0.0104341	415	415
ARHGEF10	-0.114501	0.0196374	0.0404313	415	415
ARHGEF11	-0.00492416	0.920336	0.944958	415	415
ARHGEF12	-0.025303	0.60726	0.693263	415	415
ARHGEF15	-0.201413	3.57827e-05	0.000154605	415	415
ARHGEF16	0.526048	6.5455e-31	1.47092e-27	415	415
ARHGEF17	-0.193744	7.10734e-05	0.000284758	415	415
ARHGEF18	0.00315767	0.948865	0.965234	415	415
ARHGEF19	0.162657	0.000881779	0.00263777	415	415
ARHGEF1	0.0581523	0.237174	0.331137	415	415
ARHGEF2	-0.0731458	0.136858	0.211456	415	415
ARHGEF33	-0.235305	1.2515e-06	7.90987e-06	415	408
ARHGEF35	0.349268	2.37755e-13	9.08997e-12	415	415
ARHGEF37	0.0360637	0.463744	0.564538	415	415
ARHGEF38	0.191836	8.39618e-05	0.000330311	415	410
ARHGEF3	-0.208784	1.80472e-05	8.418e-05	415	415
ARHGEF4	0.0397809	0.418933	0.521379	415	415
ARHGEF5	0.389641	1.69873e-16	1.37427e-14	415	415
ARHGEF6	-0.375926	2.23147e-15	1.39726e-13	415	415
ARHGEF7	-0.104731	0.0329271	0.0631203	415	415
ARHGEF9	-0.183684	0.000168092	0.000610132	415	415
ARID1A	-0.0792862	0.106777	0.171571	415	415
ARID1B	-0.0691139	0.159905	0.23997	415	415
ARID2	-0.219735	6.23721e-06	3.27826e-05	415	415
ARID3A	-0.0642114	0.191727	0.278349	415	415
ARID3B	0.0257961	0.600272	0.687536	415	415
ARID3C	-0.0189591	0.700166	0.772088	415	252
ARID4A	-0.171451	0.000451169	0.00145998	415	415
ARID4B	-0.0503307	0.306369	0.405678	415	415
ARID5A	-0.200613	3.84854e-05	0.000164908	415	415
ARID5B	-0.206763	2.18254e-05	9.99138e-05	415	415
ARIH1	-0.241545	6.36729e-07	4.33014e-06	415	415
ARIH2	-0.268065	2.91845e-08	2.83097e-07	415	415
ARL10	-0.193004	7.58304e-05	0.000301995	415	414
ARL11	-0.172325	0.000421316	0.00137504	415	415
ARL13A	-0.0184912	0.707222	0.778341	415	335
ARL13B	-0.0755506	0.124382	0.195465	415	415
ARL14	0.368616	8.38463e-15	4.6716e-13	415	412
ARL15	-0.198052	4.84931e-05	0.000202932	415	415
ARL16	-0.016714	0.734242	0.800715	415	415
ARL17A	-0.186229	0.000135766	0.00050578	415	415
ARL17B	-0.0683106	0.164827	0.245916	415	361
ARL1	-0.0206327	0.675145	0.751214	415	415
ARL2BP	-0.185277	0.000147106	0.000542231	415	415
ARL2	0.0325068	0.509004	0.60585	415	415
ARL3	-0.159577	0.00110646	0.00323243	415	415
ARL4A	0.111309	0.023345	0.046943	415	415
ARL4C	-0.149045	0.0023335	0.00625593	415	415
ARL4D	-0.0977181	0.0466539	0.0850605	415	415
ARL5A	-0.221853	5.04684e-06	2.73505e-05	415	415
ARL5B	-0.00402885	0.934785	0.955284	415	415
ARL5C	-0.0255084	0.604344	0.690752	415	198
ARL6IP1	0.255223	1.35566e-07	1.10647e-06	415	415
ARL6IP4	0.0840054	0.0874175	0.144897	415	415
ARL6IP5	-0.159979	0.00107443	0.00314567	415	415
ARL6IP6	0.0314988	0.522236	0.617548	415	415
ARL6	-0.191125	8.93063e-05	0.000348422	415	415
ARL8A	0.207381	2.05971e-05	9.49355e-05	415	415
ARL8B	-0.0394445	0.42288	0.525058	415	415
ARL9	-0.0725886	0.139882	0.215371	415	398
ARMC10	0.0958343	0.0510694	0.0919013	415	415
ARMC1	-0.128667	0.00868643	0.0198894	415	415
ARMC2	-0.0691501	0.159686	0.23973	415	415
ARMC3	0.0903912	0.0658237	0.114185	415	335
ARMC4	-0.315318	4.94625e-11	1.01048e-09	415	336
ARMC5	-0.00566095	0.908465	0.936717	415	415
ARMC6	0.107436	0.0286417	0.056023	415	415
ARMC7	0.256378	1.18473e-07	9.83631e-07	415	415
ARMC8	-0.202266	3.31002e-05	0.000144465	415	415
ARMC9	-0.245195	4.25161e-07	3.02561e-06	415	415
ARMCX1	-0.284862	3.45379e-09	4.34679e-08	415	415
ARMCX2	-0.23436	1.38413e-06	8.65618e-06	415	415
ARMCX3	-0.0656828	0.181724	0.266639	415	415
ARMCX5	0.120175	0.0142994	0.0307699	415	415
ARMCX6	-0.033427	0.497078	0.59484	415	415
ARMS2	-0.0160535	0.744372	0.808969	415	256
ARNT2	-0.204312	2.74169e-05	0.000122084	415	415
ARNTL2	0.063467	0.196938	0.284587	415	415
ARNTL	-0.155399	0.00149585	0.00421711	415	415
ARNT	-0.105049	0.0323964	0.0622662	415	415
ARPC1A	0.274971	1.23487e-08	1.32144e-07	415	415
ARPC1B	0.354005	1.07049e-13	4.48255e-12	415	415
ARPC2	0.0925148	0.059697	0.104971	415	415
ARPC3	0.176345	0.000306296	0.0010342	415	415
ARPC4	0.242795	5.54888e-07	3.82633e-06	415	415
ARPC5L	0.116826	0.0172705	0.0361852	415	415
ARPC5	0.0121407	0.805228	0.858472	415	415
ARPM1	0.117179	0.0169332	0.0355669	415	415
ARPP19	-0.236087	1.15113e-06	7.33742e-06	415	415
ARPP21	-0.218214	7.25318e-06	3.73548e-05	415	154
ARR3	0.0364257	0.459266	0.560334	415	163
ARRB1	0.0307156	0.532638	0.626618	415	415
ARRB2	-0.0114451	0.816182	0.866888	415	415
ARRDC1	0.375228	2.5356e-15	1.57792e-13	415	415
ARRDC2	0.0154076	0.75432	0.816753	415	415
ARRDC3	-0.207448	2.04691e-05	9.44061e-05	415	415
ARRDC4	-0.13213	0.00703049	0.0165051	415	415
ARRDC5	-0.221573	5.19044e-06	2.79938e-05	415	408
ARSA	0.191357	8.75303e-05	0.000342484	415	415
ARSB	-0.366506	1.22114e-14	6.43167e-13	415	415
ARSD	0.296875	6.86435e-10	1.02762e-08	415	415
ARSE	0.135342	0.00575335	0.0138443	415	412
ARSF	0.0632277	0.198636	0.28663	415	175
ARSG	-0.279068	7.32952e-09	8.41792e-08	415	415
ARSH	0.102965	0.0360111	0.0680264	415	268
ARSI	-0.0674321	0.17034	0.252686	415	415
ARSJ	-0.0820354	0.095125	0.155807	415	415
ARSK	-0.336913	1.79036e-12	5.34072e-11	415	415
ART1	0.0359307	0.465395	0.565969	415	231
ART3	-0.308809	1.27799e-10	2.3328e-09	415	388
ART4	-0.225276	3.56773e-06	2.01557e-05	415	345
ART5	0.0575838	0.241798	0.336316	415	377
ARTN	0.166808	0.000645328	0.00200242	415	413
ARV1	-0.014959	0.761253	0.822367	415	415
ARVCF	-0.0292997	0.551705	0.643757	415	415
ARX	0.0973295	0.0475375	0.0864222	415	368
AR	-0.183981	0.000163977	0.000597807	415	407
AS3MT	-0.059788	0.224218	0.316611	415	415
ASAH1	-0.052444	0.28648	0.384879	415	415
ASAH2B	-0.0315785	0.521184	0.616706	415	338
ASAH2	0.0847634	0.0845889	0.140888	415	373
ASAM	-0.282778	4.53657e-09	5.53057e-08	415	415
ASAP1IT1	0.0220399	0.654378	0.73441	415	335
ASAP1	-0.276446	1.02452e-08	1.12431e-07	415	415
ASAP2	0.269749	2.37171e-08	2.35599e-07	415	415
ASAP3	0.0301011	0.540871	0.633601	415	415
ASB10	0.0561238	0.253962	0.349675	415	57
ASB11	0.0296149	0.547431	0.639841	415	73
ASB12	-0.00627066	0.898656	0.929589	415	353
ASB13	0.207607	2.01642e-05	9.30884e-05	415	415
ASB14	-0.0869813	0.0767347	0.12998	415	415
ASB15	0.00947061	0.847465	0.890158	415	177
ASB16	-0.243156	5.33207e-07	3.68814e-06	415	414
ASB17	-0.00544961	0.911868	0.93922	415	68
ASB18	0.121859	0.0129828	0.0282644	415	118
ASB1	-0.216859	8.28909e-06	4.19642e-05	415	415
ASB2	-0.304739	2.28689e-10	3.93302e-09	415	415
ASB3	-0.197024	5.3163e-05	0.000219927	415	415
ASB4	0.113859	0.0203385	0.0416427	415	267
ASB5	-0.210559	1.52494e-05	7.26033e-05	415	283
ASB6	0.0672992	0.171185	0.253698	415	415
ASB7	-0.149371	0.00228176	0.00612945	415	415
ASB8	-0.246071	3.85486e-07	2.77356e-06	415	415
ASB9	-0.0873358	0.075536	0.128239	415	415
ASCC1	-0.0558313	0.256449	0.352116	415	415
ASCC2	0.275564	1.14571e-08	1.24113e-07	415	415
ASCC3	-0.0612223	0.213279	0.303431	415	415
ASCL1	-0.0340138	0.48955	0.588094	415	346
ASCL2	0.100552	0.0406165	0.0754057	415	415
ASCL3	0.0232116	0.637288	0.719461	415	194
ASCL4	-0.0035203	0.943001	0.960962	415	176
ASF1A	-0.210468	1.5382e-05	7.31829e-05	415	415
ASF1B	0.198531	4.64517e-05	0.00019536	415	415
ASFMR1	0.00397628	0.935634	0.955813	415	388
ASGR1	-0.0180209	0.714338	0.783869	415	415
ASGR2	-0.226174	3.25457e-06	1.861e-05	415	390
ASH1L	-0.13581	0.00558569	0.0134987	415	415
ASH2L	-0.0685703	0.163224	0.244164	415	415
ASIP	0.0659526	0.179932	0.264548	415	379
ASL	0.375389	2.46203e-15	1.53687e-13	415	415
ASMTL	-0.137273	0.0050898	0.0124626	415	415
ASMT	-0.134845	0.00593591	0.0142311	415	239
ASNA1	0.115269	0.0188259	0.0390277	415	415
ASNSD1	-0.131131	0.00747644	0.0174146	415	415
ASNS	0.0556569	0.257939	0.35385	415	415
ASPA	-0.203617	2.92354e-05	0.000129327	415	397
ASPDH	-0.0684671	0.163859	0.244851	415	235
ASPG	0.161899	0.000932834	0.00277449	415	326
ASPHD1	0.29669	7.04112e-10	1.0502e-08	415	415
ASPHD2	0.136038	0.00550554	0.0133241	415	415
ASPH	0.204465	2.70314e-05	0.000120633	415	415
ASPM	0.0646447	0.18874	0.274861	415	415
ASPN	-0.174789	0.000346828	0.00115543	415	415
ASPRV1	0.00474338	0.923251	0.947134	415	414
ASPSCR1	0.14142	0.00389205	0.00984573	415	415
ASRGL1	0.16219	0.000912911	0.00272124	415	415
ASS1	0.186973	0.000127478	0.000479138	415	415
ASTE1	0.0409957	0.404857	0.507955	415	415
ASTL	-0.139026	0.0045478	0.0112817	415	333
ASTN1	-0.262681	5.61248e-08	5.06526e-07	415	341
ASTN2	-0.217915	7.47025e-06	3.83564e-05	415	415
ASXL1	-0.171293	0.000456762	0.00147596	415	415
ASXL2	-0.187457	0.000122347	0.000461569	415	415
ASXL3	-0.156886	0.00134481	0.00384109	415	402
ASZ1	0.0673093	0.171121	0.253621	415	37
ATAD1	-0.112425	0.0219851	0.0446076	415	415
ATAD2B	-0.171336	0.000455208	0.00147188	415	415
ATAD2	0.0034427	0.944256	0.961883	415	415
ATAD3A	0.178417	0.000259168	0.00089479	415	415
ATAD3B	0.119845	0.0145708	0.031284	415	415
ATAD3C	-0.00481767	0.922053	0.946337	415	414
ATAD5	-0.0627315	0.202189	0.290638	415	415
ATCAY	-0.200587	3.85769e-05	0.00016523	415	325
ATE1	-0.0601886	0.221123	0.312918	415	415
ATF1	-0.117196	0.0169174	0.0355523	415	415
ATF2	-0.13767	0.00496216	0.0121855	415	415
ATF3	-0.053706	0.275026	0.37254	415	415
ATF4	-0.0418451	0.395186	0.498263	415	415
ATF5	-0.00722361	0.883358	0.917424	415	415
ATF6B	0.14153	0.00386412	0.00978611	415	415
ATF6	-0.0527267	0.283886	0.381959	415	415
ATF7IP2	0.00233538	0.962169	0.974309	415	415
ATF7IP	-0.218404	7.11817e-06	3.67539e-05	415	415
ATF7	-0.114671	0.0194548	0.0401355	415	415
ATG10	-0.170583	0.000482706	0.00154792	415	415
ATG12	-0.179731	0.000232902	0.000814252	415	415
ATG16L1	0.177949	0.000269186	0.000924722	415	415
ATG16L2	-0.158229	0.00122049	0.00352786	415	415
ATG2A	0.123916	0.011521	0.0254381	415	415
ATG2B	-0.144334	0.00320991	0.00829653	415	415
ATG3	0.0657578	0.181225	0.2661	415	415
ATG4A	0.0181569	0.712277	0.782485	415	415
ATG4B	0.0752127	0.12608	0.197672	415	415
ATG4C	-0.295153	8.69409e-10	1.27604e-08	415	415
ATG4D	0.316893	3.917e-11	8.15875e-10	415	415
ATG5	0.00174235	0.971771	0.980987	415	415
ATG7	0.0650525	0.185961	0.271537	415	415
ATG9A	0.239994	7.54513e-07	5.03465e-06	415	415
ATG9B	0.17067	0.000479468	0.00154003	415	415
ATHL1	0.0485224	0.324096	0.424646	415	415
ATIC	0.0490213	0.31914	0.419457	415	415
ATL1	-0.258291	9.46361e-08	8.0726e-07	415	415
ATL2	-0.185446	0.000145023	0.00053543	415	415
ATL3	-0.0912127	0.0633951	0.110608	415	415
ATMIN	-0.0894248	0.0687781	0.118477	415	415
ATM	-0.312954	7.00134e-11	1.37344e-09	415	415
ATN1	-0.104673	0.0330254	0.0632577	415	415
ATOH1	0.18379	0.000166602	0.000605702	415	338
ATOH7	0.0159106	0.74657	0.810804	415	374
ATOH8	-0.120306	0.0141933	0.0305838	415	415
ATOX1	0.0688112	0.161747	0.242374	415	415
ATP10A	-0.239772	7.72959e-07	5.13525e-06	415	415
ATP10B	0.206554	2.22562e-05	0.000101656	415	415
ATP10D	-0.241726	6.24201e-07	4.25209e-06	415	415
ATP11A	0.127079	0.0095559	0.021587	415	415
ATP11B	0.0120188	0.807144	0.859908	415	415
ATP11C	-0.377995	1.52486e-15	1.00131e-13	415	415
ATP12A	0.0842259	0.086587	0.143767	415	190
ATP13A1	0.161007	0.000996273	0.00294026	415	415
ATP13A2	0.379051	1.25411e-15	8.42668e-14	415	415
ATP13A3	-0.0218306	0.657451	0.737041	415	415
ATP13A4	0.131675	0.00723052	0.0169197	415	391
ATP13A5	0.0439088	0.372273	0.47512	415	146
ATP1A1	0.294664	9.2942e-10	1.35526e-08	415	415
ATP1A2	-0.189278	0.000104723	0.000402314	415	405
ATP1A3	-0.155446	0.00149089	0.00420548	415	415
ATP1A4	-0.051662	0.293736	0.392417	415	277
ATP1B1	0.377507	1.66848e-15	1.08157e-13	415	415
ATP1B2	-0.233853	1.46072e-06	9.08181e-06	415	415
ATP1B3	0.145426	0.00298362	0.00778829	415	415
ATP1B4	0.0309707	0.529238	0.623403	415	64
ATP2A1	-0.049159	0.317781	0.417888	415	413
ATP2A2	0.0952581	0.0524874	0.0940514	415	415
ATP2A3	0.103512	0.0350298	0.0664676	415	415
ATP2B1	-0.00833923	0.865503	0.90408	415	415
ATP2B2	-0.187793	0.000118902	0.000449914	415	376
ATP2B3	-0.299487	4.78216e-10	7.51529e-09	415	208
ATP2B4	-0.275911	1.09652e-08	1.19553e-07	415	415
ATP2C1	-0.0959938	0.0506823	0.0913185	415	415
ATP2C2	0.352044	1.49192e-13	6.01077e-12	415	414
ATP4A	0.0463097	0.346674	0.448563	415	256
ATP4B	0.0749355	0.127486	0.199582	415	300
ATP5A1	-0.0164864	0.737728	0.803389	415	415
ATP5B	0.0261262	0.595615	0.683362	415	415
ATP5C1	0.148591	0.00240721	0.00642971	415	415
ATP5D	0.15706	0.00132803	0.00380069	415	415
ATP5EP2	-0.0110269	0.822785	0.871495	415	415
ATP5E	0.122701	0.012366	0.0270556	415	415
ATP5F1	0.040626	0.409111	0.511769	415	415
ATP5G1	0.188164	0.000115201	0.000437139	415	415
ATP5G2	0.147909	0.00252206	0.00670548	415	415
ATP5G3	0.184579	0.000155981	0.000571714	415	415
ATP5H	0.062542	0.203558	0.292191	415	415
ATP5I	0.164829	0.000749562	0.00228415	415	415
ATP5J2	0.29603	7.70955e-10	1.14148e-08	415	415
ATP5J	-0.032429	0.510017	0.606842	415	415
ATP5L2	-0.0264528	0.591024	0.679058	415	326
ATP5L	0.0264962	0.590414	0.678473	415	415
ATP5O	0.0529564	0.28179	0.379669	415	415
ATP5SL	0.145028	0.00306441	0.00797243	415	415
ATP5S	-0.0428593	0.383821	0.486726	415	415
ATP6AP1L	-0.0924803	0.0597926	0.105111	415	415
ATP6AP1	0.2791	7.29933e-09	8.39057e-08	415	415
ATP6AP2	-0.173427	0.000386333	0.00127236	415	415
ATP6V0A1	0.0343045	0.485845	0.584812	415	415
ATP6V0A2	-0.100568	0.0405861	0.0753592	415	415
ATP6V0A4	0.0968078	0.0487458	0.0883488	415	269
ATP6V0B	0.337641	1.59366e-12	4.8615e-11	415	415
ATP6V0C	0.321386	1.99867e-11	4.54191e-10	415	415
ATP6V0D1	0.173469	0.000385049	0.00126834	415	415
ATP6V0D2	0.0592348	0.228542	0.321594	415	407
ATP6V0E1	0.100341	0.0410438	0.0761081	415	415
ATP6V0E2	0.00531849	0.91398	0.940521	415	415
ATP6V1A	-0.0629928	0.200312	0.288417	415	415
ATP6V1B1	0.0961865	0.0502182	0.0906357	415	407
ATP6V1B2	-0.209618	1.66764e-05	7.86202e-05	415	415
ATP6V1C1	-0.0150012	0.7606	0.821925	415	415
ATP6V1C2	0.188862	0.000108527	0.00041456	415	415
ATP6V1D	0.0148204	0.763399	0.823981	415	415
ATP6V1E1	-0.0428301	0.384146	0.487045	415	415
ATP6V1E2	0.0628275	0.201498	0.289747	415	415
ATP6V1F	0.158362	0.00120877	0.00349798	415	415
ATP6V1G1	0.00587603	0.905003	0.934386	415	415
ATP6V1G2	-0.277425	9.04414e-09	1.01115e-07	415	414
ATP6V1G3	0.0843048	0.0862913	0.143358	415	54
ATP6V1H	0.0514448	0.295772	0.394565	415	415
ATP7A	-0.0819689	0.0953943	0.156096	415	415
ATP7B	0.197411	5.13602e-05	0.000213473	415	415
ATP8A1	-0.111666	0.0229017	0.0461847	415	415
ATP8A2	-0.219306	6.50893e-06	3.40692e-05	415	395
ATP8B1	0.284621	3.56487e-09	4.48101e-08	415	415
ATP8B2	-0.326977	8.51772e-12	2.11921e-10	415	415
ATP8B3	0.0608383	0.21617	0.306831	415	415
ATP8B4	-0.336595	1.88376e-12	5.57002e-11	415	415
ATP8B5P	-0.0550601	0.263086	0.359424	415	406
ATP9A	0.0115063	0.815217	0.865999	415	415
ATP9B	0.00996261	0.839646	0.884517	415	415
ATPAF1	-0.240281	7.312e-07	4.89362e-06	415	415
ATPAF2	0.0100258	0.838643	0.883668	415	415
ATPBD4	0.0217142	0.659162	0.738426	415	415
ATPIF1	0.282373	4.78178e-09	5.79111e-08	415	415
ATRIP	-0.0645899	0.189116	0.275309	415	415
ATRNL1	-0.163228	0.000845097	0.0025412	415	399
ATRN	-0.00227588	0.963132	0.974894	415	415
ATRX	-0.190417	9.49443e-05	0.000368351	415	415
ATR	-0.130828	0.00761642	0.0177121	415	415
ATXN10	-0.156681	0.00136479	0.00388916	415	415
ATXN1L	-0.108525	0.0270578	0.0533065	415	415
ATXN1	-0.168307	0.000575463	0.00180986	415	415
ATXN2L	0.116294	0.0177884	0.037151	415	415
ATXN2	-0.156646	0.00136819	0.0038969	415	415
ATXN3L	0.0869972	0.0766807	0.12991	415	25
ATXN3	-0.247654	3.22672e-07	2.35853e-06	415	415
ATXN7L1	0.00466075	0.924584	0.948213	415	415
ATXN7L2	0.0400637	0.415631	0.518098	415	415
ATXN7L3B	0.0728745	0.138325	0.213428	415	415
ATXN7L3	0.116771	0.0173233	0.0362808	415	415
ATXN7	-0.275521	1.15205e-08	1.246e-07	415	415
ATXN8OS	0.0232051	0.637383	0.719528	415	16
AUH	0.0771761	0.116462	0.184799	415	415
AUP1	0.345253	4.62756e-13	1.61645e-11	415	415
AURKAIP1	0.265502	3.99152e-08	3.73916e-07	415	415
AURKAPS1	-0.098275	0.0454117	0.0830973	415	415
AURKA	0.178569	0.000255992	0.000885486	415	415
AURKB	0.136654	0.00529447	0.0128889	415	415
AURKC	-0.128325	0.00886762	0.0202515	415	414
AUTS2	-0.0781527	0.111898	0.178494	415	415
AVEN	-0.169991	0.000505416	0.00161307	415	415
AVIL	-0.0777905	0.113574	0.180812	415	415
AVL9	0.140187	0.00421835	0.0105681	415	415
AVPI1	0.177931	0.00026958	0.000925436	415	415
AVPR1A	-0.244599	4.54319e-07	3.20831e-06	415	414
AVPR1B	-0.0148933	0.76227	0.823069	415	182
AVPR2	-0.10142	0.0389065	0.0726913	415	411
AVP	0.0204547	0.677791	0.753577	415	73
AWAT1	0.0207971	0.672706	0.749118	415	91
AWAT2	0.0453205	0.357083	0.459208	415	103
AXIN1	0.113001	0.0213098	0.0433898	415	415
AXIN2	-0.0200303	0.684113	0.75902	415	415
AXL	-0.166095	0.000681202	0.002097	415	415
AZGP1	0.19488	6.43094e-05	0.000260496	415	415
AZI1	0.0642	0.191806	0.278424	415	415
AZI2	-0.232123	1.75395e-06	1.06784e-05	415	415
AZIN1	0.0115806	0.814044	0.865208	415	415
AZU1	0.00316622	0.948726	0.965142	415	241
B2M	-0.0958216	0.0511003	0.0919486	415	415
B3GALNT1	9.66533e-05	0.998434	0.998977	415	415
B3GALNT2	-0.222204	4.87155e-06	2.65071e-05	415	415
B3GALT1	-0.114658	0.0194692	0.0401473	415	331
B3GALT2	-0.181946	0.000194156	0.000692803	415	415
B3GALT4	0.321184	2.0606e-11	4.6513e-10	415	415
B3GALT5	0.280561	6.04798e-09	7.12407e-08	415	412
B3GALT6	0.179935	0.000229046	0.000801601	415	415
B3GALTL	-0.0717873	0.14432	0.220976	415	415
B3GAT1	-0.225803	3.3808e-06	1.92502e-05	415	414
B3GAT2	-0.0181329	0.712642	0.782568	415	415
B3GAT3	0.117421	0.0167063	0.0351634	415	415
B3GNT1	-0.156297	0.00140291	0.00398453	415	415
B3GNT2	0.16012	0.00106339	0.00311742	415	415
B3GNT3	0.518609	6.03295e-30	1.10924e-26	415	415
B3GNT4	0.146375	0.00279877	0.00735037	415	412
B3GNT5	0.225329	3.54841e-06	2.00633e-05	415	415
B3GNT6	0.147585	0.00257841	0.00683643	415	389
B3GNT7	0.374535	2.8779e-15	1.77456e-13	415	415
B3GNT8	0.217407	7.85373e-06	4.00812e-05	415	415
B3GNT9	0.115776	0.0183062	0.0380712	415	415
B3GNTL1	0.148614	0.00240348	0.0064206	415	415
B4GALNT1	-0.0961004	0.0504252	0.090928	415	415
B4GALNT2	0.0292173	0.552825	0.644877	415	234
B4GALNT3	0.350042	2.08898e-13	8.10933e-12	415	415
B4GALNT4	-0.0545654	0.267406	0.36417	415	401
B4GALT1	0.227895	2.72615e-06	1.58711e-05	415	415
B4GALT2	0.167597	0.000607599	0.00189845	415	415
B4GALT3	0.273582	1.47096e-08	1.54067e-07	415	415
B4GALT4	0.191776	8.44025e-05	0.000331657	415	415
B4GALT5	0.129943	0.00803977	0.0185961	415	415
B4GALT6	-0.0564614	0.251112	0.346647	415	415
B4GALT7	0.198335	4.72763e-05	0.000198549	415	415
B9D1	-0.0119618	0.808041	0.860592	415	415
B9D2	0.010271	0.834752	0.880692	415	415
BAALC	-0.239843	7.67062e-07	5.10659e-06	415	412
BAAT	0.0949669	0.0532167	0.0951979	415	407
BACE1	-0.197042	5.30814e-05	0.000219679	415	415
BACE2	0.348526	2.69113e-13	1.0098e-11	415	415
BACH1	-0.188687	0.000110163	0.000419672	415	415
BACH2	-0.205881	2.36997e-05	0.00010728	415	414
BAD	0.21885	6.81018e-06	3.53804e-05	415	415
BAG1	0.239044	8.36697e-07	5.52471e-06	415	415
BAG2	-0.337989	1.50717e-12	4.64475e-11	415	415
BAG3	0.0146674	0.765769	0.825702	415	415
BAG4	-0.0549824	0.263762	0.360055	415	415
BAG5	-0.134836	0.00593936	0.014236	415	415
BAGE2	-0.0581762	0.236981	0.330913	415	287
BAGE	-0.016456	0.738194	0.803724	415	117
BAHCC1	-0.0635824	0.196124	0.283735	415	415
BAHD1	-0.121773	0.0130473	0.0283958	415	415
BAI1	-0.147066	0.00267096	0.00705041	415	406
BAI2	-0.0773202	0.11578	0.183832	415	415
BAI3	-0.279749	6.71531e-09	7.81457e-08	415	380
BAIAP2L1	0.459534	4.51284e-23	1.42613e-20	415	415
BAIAP2L2	0.400811	1.90442e-17	1.91627e-15	415	415
BAIAP2	0.293212	1.13245e-09	1.62155e-08	415	415
BAIAP3	0.167537	0.000610405	0.00190575	415	415
BAK1	0.325157	1.12657e-11	2.73856e-10	415	415
BAMBI	0.0892293	0.0693887	0.119417	415	415
BANF1	0.122133	0.0127791	0.027866	415	415
BANF2	-0.0394915	0.422327	0.52457	415	131
BANK1	-0.0601894	0.221117	0.312918	415	415
BANP	0.0987926	0.0442822	0.0813227	415	415
BAP1	-0.0494829	0.314599	0.41435	415	415
BARD1	-0.221915	5.01538e-06	2.72125e-05	415	415
BARHL1	-0.0367887	0.454801	0.556262	415	191
BARHL2	0.0905325	0.0654005	0.113617	415	112
BARX1	-0.18598	0.000138642	0.000514785	415	414
BARX2	0.332244	3.75256e-12	1.027e-10	415	413
BASE	0.0421881	0.39132	0.494405	415	47
BASP1	-0.186001	0.000138396	0.000513967	415	415
BAT1	-0.0506176	0.303616	0.402797	415	415
BAT2L1	-0.199322	4.32582e-05	0.000183417	415	415
BAT2L2	0.00890818	0.856423	0.89719	415	415
BAT2	-0.0180943	0.713225	0.78303	415	415
BAT3	0.182635	0.000183404	0.000658854	415	415
BAT4	0.0600741	0.222004	0.313967	415	415
BAT5	0.121683	0.0131152	0.0285221	415	415
BATF2	-0.0181533	0.712332	0.782485	415	415
BATF3	-0.197696	5.00666e-05	0.000208611	415	415
BATF	0.156443	0.00138826	0.00394793	415	415
BAX	0.120438	0.0140865	0.0303827	415	415
BAZ1A	-0.0359828	0.464748	0.565351	415	415
BAZ1B	-0.1087	0.0268098	0.0528849	415	415
BAZ2A	-0.106349	0.0303026	0.0588167	415	415
BAZ2B	-0.0873249	0.0755727	0.12828	415	415
BBC3	0.0851056	0.0833364	0.139192	415	415
BBOX1	0.173938	0.000371036	0.00122569	415	374
BBS10	-0.18667	0.000130795	0.000489877	415	415
BBS12	-0.124952	0.0108412	0.02414	415	415
BBS1	-0.056546	0.250402	0.345738	415	415
BBS2	-0.152329	0.00185824	0.00510359	415	415
BBS4	-0.191123	8.93252e-05	0.000348429	415	415
BBS5	-0.0100244	0.838665	0.883668	415	415
BBS7	-0.15621	0.00141168	0.00400552	415	415
BBS9	-0.137996	0.00485966	0.0119613	415	415
BBX	-0.312716	7.24852e-11	1.41644e-09	415	415
BCAM	0.00196305	0.968197	0.978453	415	415
BCAN	0.257188	1.07748e-07	9.05357e-07	415	415
BCAP29	-0.119541	0.0148244	0.0317508	415	415
BCAP31	0.271501	1.90812e-08	1.94124e-07	415	415
BCAR1	0.407642	4.79341e-18	5.47722e-16	415	415
BCAR3	0.225526	3.47766e-06	1.97295e-05	415	415
BCAR4	0.0335421	0.495597	0.593735	415	184
BCAS1	0.336656	1.86543e-12	5.53201e-11	415	415
BCAS2	-0.106722	0.0297248	0.0578396	415	415
BCAS3	-0.0271205	0.581687	0.670922	415	415
BCAS4	-0.0145894	0.766979	0.826817	415	415
BCAT1	-0.232199	1.73996e-06	1.05996e-05	415	415
BCAT2	0.081701	0.0964855	0.157645	415	415
BCCIP	0.0124731	0.800006	0.854608	415	415
BCDIN3D	-0.0590494	0.230005	0.323247	415	415
BCHE	-0.229253	2.36826e-06	1.39604e-05	415	410
BCKDHA	0.0608653	0.215965	0.306571	415	415
BCKDHB	-0.0815168	0.0972415	0.158647	415	415
BCKDK	0.150199	0.00215517	0.00582255	415	415
BCL10	0.287403	2.46943e-09	3.23683e-08	415	415
BCL11A	-0.159113	0.00114458	0.00333032	415	415
BCL11B	0.0961042	0.050416	0.0909197	415	415
BCL2A1	-0.170693	0.000478605	0.00153794	415	415
BCL2L10	0.225705	3.41465e-06	1.93992e-05	415	367
BCL2L11	-0.208512	1.8518e-05	8.61574e-05	415	415
BCL2L12	0.181712	0.000197948	0.000703924	415	415
BCL2L13	0.0176889	0.719377	0.787944	415	415
BCL2L14	0.191182	8.88646e-05	0.000347101	415	415
BCL2L15	0.322277	1.7467e-11	4.03277e-10	415	415
BCL2L1	0.278472	7.91153e-09	8.95416e-08	415	415
BCL2L2	-0.181677	0.000198523	0.000705646	415	415
BCL2	-0.382867	6.15393e-16	4.44844e-14	415	415
BCL3	0.320225	2.38078e-11	5.23953e-10	415	415
BCL6B	-0.224076	4.03134e-06	2.24921e-05	415	415
BCL6	-0.241775	6.20855e-07	4.23787e-06	415	415
BCL7A	-0.0785079	0.110273	0.176319	415	415
BCL7B	0.093812	0.0561918	0.0997436	415	415
BCL7C	0.181415	0.000202854	0.000719398	415	415
BCL8	-0.0166121	0.735803	0.801941	415	351
BCL9L	0.0951156	0.0528432	0.0946302	415	415
BCL9	-0.0866682	0.0778063	0.131542	415	415
BCLAF1	-0.250137	2.43524e-07	1.849e-06	415	415
BCMO1	0.119463	0.0148907	0.0318726	415	413
BCO2	-0.0257413	0.601048	0.688151	415	414
BCORL1	-0.0447482	0.363194	0.465808	415	415
BCORL2	-0.0798772	0.104182	0.168109	415	240
BCOR	-0.139095	0.00452783	0.0112431	415	415
BCR	0.178373	0.000260106	0.000897719	415	415
BCS1L	0.117968	0.0162016	0.0342401	415	415
BCYRN1	0.0451369	0.359037	0.461342	415	18
BDH1	0.29579	7.96715e-10	1.17617e-08	415	415
BDH2	-0.0618056	0.208942	0.298436	415	415
BDKRB1	-0.0502	0.307628	0.406919	415	415
BDKRB2	0.069579	0.157106	0.236618	415	415
BDNFOS	-0.0405433	0.410066	0.512678	415	414
BDNF	0.125796	0.010314	0.0230897	415	415
BDP1	-0.311957	8.09821e-11	1.55542e-09	415	415
BEAN	0.0841148	0.0870046	0.144316	415	411
BECN1	-0.00321052	0.94801	0.964801	415	415
BEGAIN	0.0531508	0.280026	0.377719	415	415
BEND2	0.0976069	0.0469055	0.0854497	415	109
BEND3	0.104228	0.0337827	0.0644702	415	415
BEND4	-0.265843	3.8293e-08	3.60497e-07	415	390
BEND5	-0.213862	1.11028e-05	5.46494e-05	415	412
BEND6	-0.167631	0.000606034	0.00189444	415	412
BEND7	0.00285245	0.953801	0.968697	415	415
BEST1	-0.18663	0.000131237	0.000491075	415	415
BEST2	0.0271782	0.580884	0.67034	415	260
BEST3	0.0849626	0.0838581	0.139925	415	324
BEST4	0.0555688	0.258695	0.354623	415	406
BET1L	0.187959	0.00011723	0.000443919	415	415
BET1	0.0132733	0.787473	0.844153	415	415
BET3L	-0.164316	0.000779047	0.00236509	415	284
BEX1	-0.183473	0.00017106	0.000619351	415	356
BEX2	-0.151528	0.00196516	0.00536012	415	399
BEX4	-0.251242	2.14662e-07	1.65518e-06	415	415
BEX5	-0.0434193	0.377633	0.480535	415	404
BEYLA	0.0468678	0.340887	0.44247	415	14
BFAR	0.0210792	0.668528	0.745821	415	415
BFSP1	-0.0394752	0.42252	0.52468	415	415
BFSP2	-0.127472	0.00933346	0.021153	415	336
BGLAP	0.0334162	0.497216	0.59497	415	415
BGN	-0.0313303	0.524465	0.619513	415	415
BHLHA15	0.116912	0.0171873	0.0360334	415	410
BHLHB9	-0.0827828	0.0921393	0.151518	415	415
BHLHE22	-0.275707	1.12517e-08	1.2215e-07	415	415
BHLHE23	0.00623966	0.899155	0.929914	415	65
BHLHE40	0.167966	0.000590687	0.0018523	415	415
BHLHE41	0.116025	0.0180555	0.0376233	415	415
BHMT2	-0.218879	6.79081e-06	3.53141e-05	415	415
BHMT	-0.0070195	0.886631	0.92002	415	350
BICC1	-0.190677	9.2834e-05	0.000360862	415	415
BICD1	-0.210195	1.57878e-05	7.47618e-05	415	415
BICD2	-0.18782	0.000118621	0.00044902	415	415
BID	0.285405	3.2158e-09	4.07772e-08	415	415
BIK	0.317967	3.33881e-11	7.09703e-10	415	415
BIN1	0.205964	2.35189e-05	0.000106581	415	415
BIN2	-0.312265	7.74316e-11	1.50005e-09	415	415
BIN3	0.141054	0.00398647	0.0100607	415	415
BIRC2	-0.00704907	0.886157	0.919669	415	415
BIRC3	-0.141328	0.0039157	0.00989939	415	415
BIRC5	0.174054	0.000367647	0.00121557	415	415
BIRC6	-0.15079	0.0020687	0.00561075	415	415
BIRC7	0.094113	0.0554034	0.0985258	415	387
BIRC8	0.0652722	0.184476	0.269777	415	72
BIVM	-0.113845	0.0203549	0.0416721	415	415
BLCAP	0.282511	4.69656e-09	5.70155e-08	415	415
BLID	-0.11094	0.0238104	0.047746	415	144
BLK	-0.160417	0.00104051	0.00305521	415	396
BLMH	-0.175893	0.000317591	0.00106823	415	415
BLM	0.0234132	0.634367	0.716884	415	415
BLNK	0.126618	0.00982223	0.0220973	415	415
BLOC1S1	0.17414	0.000365155	0.00120892	415	415
BLOC1S2	0.114197	0.0199664	0.0410054	415	415
BLOC1S3	0.235557	1.21827e-06	7.7288e-06	415	415
BLVRA	-0.189805	0.000100084	0.000386741	415	415
BLVRB	0.324268	1.29057e-11	3.08615e-10	415	415
BLZF1	0.0717621	0.144461	0.221073	415	415
BMF	-0.130685	0.00768357	0.0178436	415	415
BMI1	-0.0568965	0.247472	0.342348	415	415
BMP10	0.0239709	0.626314	0.709846	415	83
BMP15	0.0591667	0.229079	0.322169	415	46
BMP1	0.0766823	0.118825	0.188018	415	415
BMP2K	-0.253478	1.6598e-07	1.31941e-06	415	415
BMP2	0.209264	1.72469e-05	8.08761e-05	415	415
BMP3	-0.200834	3.77185e-05	0.000161931	415	375
BMP4	0.200405	3.92175e-05	0.00016769	415	415
BMP5	-0.00539009	0.912827	0.93985	415	342
BMP6	-0.0377596	0.442978	0.544472	415	415
BMP7	0.135574	0.00566963	0.0136754	415	414
BMP8A	0.0257074	0.601527	0.688543	415	415
BMP8B	0.13453	0.00605451	0.0144709	415	414
BMPER	-0.27849	7.89375e-09	8.94403e-08	415	406
BMPR1A	-0.256606	1.15353e-07	9.61272e-07	415	415
BMPR1B	-0.0578147	0.239912	0.33406	415	410
BMPR2	-0.194455	6.67647e-05	0.000269537	415	415
BMS1P4	-0.123297	0.0119449	0.0262337	415	415
BMS1P5	-0.0604221	0.219334	0.310687	415	415
BMS1	-0.116998	0.0171054	0.0358876	415	415
BMX	-0.186072	0.000137577	0.000511463	415	403
BNC1	-0.00647337	0.895399	0.926978	415	372
BNC2	-0.255858	1.25898e-07	1.03592e-06	415	415
BNIP1	0.0902417	0.0662737	0.114848	415	415
BNIP2	-0.281462	5.38225e-09	6.42597e-08	415	415
BNIP3L	-0.0918354	0.0616036	0.107826	415	415
BNIP3	-0.132976	0.00667161	0.0157509	415	415
BNIPL	0.140146	0.00422967	0.0105925	415	400
BOC	-0.220737	5.64403e-06	3.00871e-05	415	415
BOD1L	-0.218671	6.93233e-06	3.58951e-05	415	415
BOD1	-0.110686	0.0241353	0.0483176	415	415
BOK	0.207285	2.07839e-05	9.56657e-05	415	415
BOLA1	0.150842	0.00206125	0.00559279	415	415
BOLA2	0.33733	1.67498e-12	5.07745e-11	415	415
BOLA3	0.130831	0.00761532	0.0177116	415	415
BOLL	0.097269	0.0476764	0.0866419	415	335
BOP1	0.210753	1.49702e-05	7.14759e-05	415	415
BPESC1	0.00720948	0.883584	0.917612	415	165
BPGM	-0.0301148	0.540688	0.633423	415	415
BPHL	0.203511	2.95226e-05	0.000130541	415	415
BPIL1	0.10744	0.0286357	0.0560167	415	152
BPIL2	0.0939537	0.0558196	0.0991438	415	69
BPIL3	0.110301	0.0246344	0.0491644	415	16
BPI	-0.114737	0.0193852	0.040019	415	318
BPNT1	0.347883	2.99462e-13	1.11131e-11	415	415
BPTF	-0.192172	8.15425e-05	0.000322046	415	415
BPY2	0.0793391	0.106543	0.171268	415	17
BRAF	-0.166892	0.000641204	0.00199146	415	415
BRAP	-0.118794	0.0154653	0.0328903	415	415
BRCA1	-0.0477449	0.331919	0.433261	415	415
BRCA2	-0.00765634	0.876424	0.912425	415	415
BRCC3	0.0524354	0.286559	0.384939	415	415
BRD1	-0.106798	0.0296077	0.0576395	415	415
BRD2	-0.0739262	0.132708	0.20613	415	415
BRD3	-0.131222	0.00743456	0.0173191	415	415
BRD4	-0.0297655	0.545395	0.637798	415	415
BRD7P3	-0.166659	0.000652649	0.00202265	415	387
BRD7	-0.0719795	0.143246	0.219581	415	415
BRD8	-0.242813	5.53779e-07	3.82128e-06	415	415
BRD9	0.0397742	0.419011	0.521411	415	415
BRDT	0.0114128	0.816691	0.867155	415	189
BREA2	-0.0424979	0.387848	0.490847	415	390
BRE	0.157422	0.00129386	0.00371657	415	415
BRF1	0.0957812	0.0511987	0.0921175	415	415
BRF2	0.0566115	0.249852	0.345121	415	415
BRI3BP	0.18476	0.000153625	0.000563793	415	415
BRI3	0.315324	4.94155e-11	1.01048e-09	415	415
BRIP1	-0.0700682	0.154202	0.233055	415	415
BRIX1	0.0756597	0.123838	0.194761	415	415
BRMS1L	-0.251165	2.16565e-07	1.66668e-06	415	415
BRMS1	0.288916	2.01904e-09	2.7164e-08	415	415
BRP44L	0.0941135	0.0554021	0.0985258	415	415
BRP44	0.188842	0.000108707	0.000414988	415	415
BRPF1	-0.0847886	0.0844964	0.140781	415	415
BRPF3	0.0115303	0.814839	0.865825	415	415
BRS3	-0.072382	0.141016	0.216705	415	149
BRSK1	-0.0901055	0.066686	0.115473	415	415
BRSK2	0.0743743	0.13037	0.203263	415	409
BRWD1	-0.188664	0.000110381	0.000420395	415	415
BRWD3	-0.0898711	0.0674006	0.116511	415	415
BSCL2	0.187127	0.000125828	0.000473554	415	415
BSDC1	0.172735	0.000407982	0.00133713	415	415
BSG	0.323589	1.43113e-11	3.3893e-10	415	415
BSND	-0.0143245	0.771093	0.830335	415	127
BSN	-0.217314	7.9262e-06	4.03967e-05	415	415
BSPH1	-0.0096693	0.844306	0.888208	415	21
BSPRY	0.347888	2.9925e-13	1.11131e-11	415	415
BST1	-0.0361118	0.463148	0.564083	415	415
BST2	-0.104963	0.0325393	0.0624806	415	415
BSX	0.0320885	0.514473	0.610671	415	25
BTAF1	-0.256528	1.16415e-07	9.69723e-07	415	415
BTBD10	0.0410153	0.404632	0.507736	415	415
BTBD11	0.0218975	0.656469	0.736184	415	415
BTBD12	-0.104354	0.0335657	0.0641106	415	415
BTBD16	0.220601	5.72155e-06	3.04442e-05	415	384
BTBD17	-0.067525	0.16975	0.251922	415	303
BTBD18	-0.116808	0.0172874	0.0362169	415	413
BTBD19	-0.097916	0.0462093	0.0843148	415	415
BTBD1	0.0253458	0.606653	0.692764	415	415
BTBD2	0.114381	0.0197673	0.0406501	415	415
BTBD3	-0.0592744	0.228231	0.3212	415	415
BTBD6	0.239388	8.05988e-07	5.34288e-06	415	415
BTBD7	-0.0805865	0.101132	0.163829	415	415
BTBD8	-0.0378655	0.441698	0.543291	415	408
BTBD9	0.0716116	0.145307	0.222067	415	415
BTC	-0.0645617	0.18931	0.275532	415	413
BTD	0.068218	0.165402	0.246627	415	415
BTF3L1	-0.0352942	0.473342	0.573322	415	70
BTF3L4	-0.283826	3.9564e-09	4.89707e-08	415	415
BTF3	-0.118928	0.0153488	0.0326836	415	415
BTG1	-0.197499	5.09576e-05	0.000212061	415	415
BTG2	-0.308154	1.40442e-10	2.52933e-09	415	415
BTG3	-0.111578	0.02301	0.0463523	415	415
BTG4	-0.0506233	0.303562	0.402786	415	50
BTK	-0.336353	1.95783e-12	5.73871e-11	415	414
BTLA	-0.287636	2.39426e-09	3.15466e-08	415	410
BTN1A1	-0.087075	0.0764164	0.129536	415	392
BTN2A1	-0.203149	3.05215e-05	0.000134458	415	415
BTN2A2	-0.361392	3.00227e-14	1.41212e-12	415	415
BTN2A3	-0.185128	0.000148957	0.000548252	415	415
BTN3A1	-0.171771	0.000440002	0.00142773	415	415
BTN3A2	-0.105716	0.0313078	0.0604602	415	415
BTN3A3	-0.234565	1.3543e-06	8.49059e-06	415	415
BTNL2	-0.126307	0.0100055	0.0224796	415	134
BTNL3	0.233201	1.56529e-06	9.6577e-06	415	389
BTNL8	0.165615	0.000706397	0.00216632	415	410
BTNL9	-0.0520599	0.290028	0.388593	415	415
BTRC	-0.202578	3.2165e-05	0.000140931	415	415
BUB1B	0.0754232	0.12502	0.196269	415	415
BUB1	0.0799123	0.104029	0.167942	415	415
BUB3	-0.041687	0.396975	0.50002	415	415
BUD13	-0.0176433	0.72007	0.788575	415	415
BUD31	0.226724	3.07581e-06	1.76778e-05	415	415
BVES	-0.259549	8.1555e-08	7.061e-07	415	415
BYSL	0.109572	0.0256054	0.0507814	415	415
BZRAP1	-0.292104	1.31585e-09	1.84942e-08	415	415
BZW1	0.0676705	0.16883	0.250759	415	415
BZW2	0.179429	0.000238713	0.000832123	415	415
C10orf105	-0.184558	0.000156248	0.00057238	415	401
C10orf107	-0.0601318	0.221561	0.313427	415	376
C10orf108	0.125806	0.0103078	0.0230794	415	414
C10orf10	-0.0382802	0.43671	0.538138	415	415
C10orf110	0.0485349	0.323971	0.42451	415	414
C10orf111	0.100224	0.0412811	0.076485	415	415
C10orf113	0.171946	0.000434039	0.00141178	415	120
C10orf114	-0.134666	0.00600317	0.0143685	415	415
C10orf116	0.280781	5.87803e-09	6.94817e-08	415	415
C10orf118	0.0791603	0.107337	0.172248	415	415
C10orf119	-0.133885	0.00630413	0.0149807	415	415
C10orf11	-0.0821287	0.0947482	0.155252	415	412
C10orf120	0.0300203	0.54196	0.634472	415	86
C10orf122	0.028976	0.55611	0.647701	415	64
C10orf125	0.282102	4.9534e-09	5.98105e-08	415	415
C10orf128	-0.307193	1.61188e-10	2.86219e-09	415	410
C10orf129	0.0156537	0.750524	0.814212	415	159
C10orf12	-0.0129942	0.791838	0.848023	415	415
C10orf131	-0.181377	0.000203487	0.000721389	415	328
C10orf137	-0.240684	6.99748e-07	4.70023e-06	415	415
C10orf140	-0.321732	1.89711e-11	4.33548e-10	415	414
C10orf18	-0.220177	5.96856e-06	3.15758e-05	415	415
C10orf25	-0.148698	0.00238966	0.0063879	415	415
C10orf26	-0.132065	0.00705865	0.0165616	415	415
C10orf27	0.0840053	0.087418	0.144897	415	211
C10orf28	-0.0329394	0.503378	0.600461	415	415
C10orf2	-0.0128895	0.793477	0.849509	415	415
C10orf32	-0.0927852	0.0589519	0.103814	415	415
C10orf35	0.0756444	0.123914	0.194865	415	415
C10orf40	0.0995106	0.0427543	0.0788354	415	82
C10orf41	-0.0495998	0.313456	0.413167	415	415
C10orf46	-0.0164504	0.738279	0.803774	415	415
C10orf47	0.206128	2.31598e-05	0.00010526	415	415
C10orf4	-0.140479	0.0041388	0.0104032	415	415
C10orf50	-0.0429494	0.382822	0.485702	415	229
C10orf53	0.0573397	0.243803	0.33851	415	74
C10orf54	0.0724217	0.140798	0.216485	415	415
C10orf55	0.114444	0.0196983	0.040533	415	414
C10orf57	0.0388756	0.429606	0.531424	415	415
C10orf58	0.15681	0.00135214	0.00385712	415	415
C10orf62	0.0284857	0.562815	0.653628	415	227
C10orf67	0.103151	0.0356742	0.067513	415	308
C10orf68	-0.0899171	0.0672597	0.116348	415	380
C10orf71	0.028659	0.56044	0.651619	415	138
C10orf72	-0.223218	4.39757e-06	2.43008e-05	415	415
C10orf75	0.0991766	0.0434594	0.0799933	415	415
C10orf76	-0.0884165	0.0719754	0.123	415	415
C10orf78	0.121376	0.0133494	0.0290033	415	415
C10orf79	0.0760839	0.121739	0.191952	415	413
C10orf81	0.0899273	0.0672285	0.116323	415	414
C10orf82	-0.140863	0.00403654	0.0101691	415	311
C10orf84	-0.163288	0.000841328	0.00253174	415	415
C10orf88	-0.0550194	0.26344	0.359714	415	415
C10orf90	-0.00229411	0.962837	0.97479	415	221
C10orf91	0.186642	0.000131105	0.000490673	415	401
C10orf93	-0.0330721	0.501659	0.598976	415	320
C10orf95	0.296488	7.23976e-10	1.07586e-08	415	415
C10orf96	0.0763516	0.120429	0.190213	415	25
C10orf99	0.148048	0.00249823	0.00664824	415	220
C11orf10	0.209569	1.67549e-05	7.89166e-05	415	415
C11orf16	-0.00695949	0.887594	0.920688	415	311
C11orf17	-0.101892	0.0380019	0.071291	415	415
C11orf1	0.0649538	0.18663	0.272318	415	415
C11orf20	0.17171	0.000442115	0.00143367	415	378
C11orf21	-0.290893	1.54933e-09	2.14332e-08	415	401
C11orf24	0.259625	8.08192e-08	7.0123e-07	415	415
C11orf2	0.0391399	0.426474	0.528487	415	415
C11orf30	-0.251711	2.03438e-07	1.57948e-06	415	415
C11orf31	0.161021	0.000995312	0.00293786	415	415
C11orf34	-0.0807594	0.1004	0.162864	415	337
C11orf35	0.214269	1.06727e-05	5.27117e-05	415	415
C11orf36	0.0141514	0.773782	0.832743	415	86
C11orf40	0.0568557	0.247812	0.342724	415	13
C11orf41	0.122793	0.0123003	0.0269293	415	414
C11orf42	0.0764745	0.119831	0.189407	415	376
C11orf45	-0.0683483	0.164594	0.245603	415	415
C11orf46	-0.422656	2.06265e-19	3.00123e-17	415	415
C11orf48	0.221593	5.1803e-06	2.79614e-05	415	415
C11orf49	0.149987	0.00218688	0.00589729	415	415
C11orf51	0.0432073	0.379969	0.482809	415	415
C11orf52	0.377233	1.75487e-15	1.13394e-13	415	415
C11orf53	0.3069	1.68087e-10	2.97164e-09	415	398
C11orf54	0.0460387	0.349506	0.451505	415	415
C11orf57	-0.110483	0.0243976	0.0487734	415	415
C11orf58	-0.257909	9.89899e-08	8.405e-07	415	415
C11orf59	0.200553	3.86943e-05	0.000165663	415	415
C11orf61	-0.0712522	0.147343	0.224533	415	415
C11orf63	-0.177876	0.000270771	0.000928353	415	414
C11orf64	0.00068496	0.988901	0.993019	415	16
C11orf65	-0.082764	0.0922133	0.151603	415	410
C11orf66	-0.0921826	0.060623	0.106285	415	409
C11orf67	0.0288431	0.557923	0.649364	415	415
C11orf68	0.0461736	0.348095	0.450113	415	415
C11orf70	0.0746862	0.128761	0.201251	415	409
C11orf71	-0.0189208	0.700743	0.772555	415	415
C11orf73	-0.0773103	0.115827	0.183891	415	415
C11orf74	-0.00966187	0.844424	0.888208	415	415
C11orf75	0.284048	3.84285e-09	4.78287e-08	415	415
C11orf80	0.220922	5.54032e-06	2.96056e-05	415	415
C11orf82	0.0250708	0.610563	0.695894	415	415
C11orf83	0.272991	1.58423e-08	1.64735e-07	415	415
C11orf84	-0.0637095	0.19523	0.282602	415	415
C11orf85	-0.00480238	0.9223	0.946494	415	186
C11orf86	0.38375	5.21239e-16	3.83348e-14	415	386
C11orf87	-0.0526004	0.285042	0.383183	415	280
C11orf88	-0.19279	7.72634e-05	0.000307185	415	290
C11orf90	0.218636	6.95624e-06	3.59913e-05	415	385
C11orf92	0.000487004	0.992108	0.995121	415	414
C11orf93	0.0917797	0.0617623	0.10802	415	415
C11orf94	0.0365448	0.457798	0.558925	415	75
C11orf95	-0.177972	0.000268674	0.000923509	415	415
C11orf9	0.327486	7.87399e-12	1.98321e-10	415	415
C12orf10	0.107772	0.0281454	0.0551696	415	415
C12orf11	0.0231745	0.637826	0.719948	415	415
C12orf12	0.0767235	0.118627	0.187733	415	93
C12orf23	-0.0701764	0.153566	0.232179	415	415
C12orf24	-0.308611	1.31506e-10	2.38584e-09	415	415
C12orf26	-0.204064	2.80526e-05	0.000124695	415	415
C12orf27	0.162133	0.000916784	0.00273077	415	413
C12orf29	-0.144901	0.00309051	0.00802897	415	415
C12orf32	-0.0163924	0.739169	0.804563	415	415
C12orf34	0.135292	0.0057715	0.0138863	415	415
C12orf35	-0.143933	0.00329688	0.00850176	415	415
C12orf36	0.346586	3.71368e-13	1.33646e-11	415	412
C12orf39	-0.286581	2.75374e-09	3.5542e-08	415	90
C12orf40	0.020841	0.672055	0.74864	415	170
C12orf41	-0.139589	0.00438527	0.0109254	415	415
C12orf42	-0.0799934	0.103677	0.167481	415	360
C12orf43	-0.0945862	0.0541826	0.0966692	415	415
C12orf44	0.256337	1.19038e-07	9.87909e-07	415	415
C12orf45	0.0562828	0.252617	0.348187	415	415
C12orf47	0.149392	0.00227846	0.0061222	415	415
C12orf48	0.0255478	0.603786	0.690348	415	415
C12orf49	0.198582	4.62411e-05	0.000194555	415	415
C12orf4	-0.351724	1.57477e-13	6.30688e-12	415	415
C12orf50	0.019888	0.686236	0.760417	415	113
C12orf51	-0.205965	2.35162e-05	0.000106581	415	415
C12orf52	0.253066	1.74074e-07	1.37579e-06	415	415
C12orf53	-0.103255	0.0354882	0.0672246	415	414
C12orf54	-0.00832034	0.865805	0.904264	415	99
C12orf56	0.13441	0.0061003	0.0145648	415	235
C12orf57	0.0599816	0.222719	0.314779	415	415
C12orf59	-0.122215	0.0127188	0.0277525	415	411
C12orf5	-0.211083	1.45046e-05	6.94826e-05	415	415
C12orf60	-0.0762712	0.120821	0.190758	415	415
C12orf61	0.000815468	0.986786	0.991788	415	414
C12orf62	0.0796947	0.104978	0.169121	415	415
C12orf63	-0.299729	4.62377e-10	7.30592e-09	415	312
C12orf65	-0.122302	0.0126554	0.027635	415	415
C12orf66	-0.0231192	0.63863	0.720694	415	415
C12orf68	-0.0440764	0.37045	0.473061	415	415
C12orf69	-0.12491	0.0108681	0.0241855	415	396
C12orf70	0.0464825	0.344876	0.446721	415	378
C12orf71	-0.0334626	0.496619	0.594564	415	278
C12orf72	-0.0986083	0.0446816	0.0819299	415	415
C12orf73	-0.0393877	0.423549	0.525603	415	415
C12orf74	-0.0341746	0.487499	0.586421	415	400
C12orf75	0.2154	9.56081e-06	4.78514e-05	415	415
C12orf76	-0.221438	5.2611e-06	2.83446e-05	415	415
C12orf77	-0.0249268	0.612614	0.697637	415	172
C13orf15	0.00494175	0.920052	0.944763	415	415
C13orf16	-0.0331237	0.500991	0.598532	415	256
C13orf18	-0.23267	1.65566e-06	1.01349e-05	415	415
C13orf1	0.115754	0.0183287	0.0381141	415	415
C13orf23	0.103421	0.0351923	0.0667195	415	415
C13orf26	-0.114613	0.0195171	0.0402256	415	122
C13orf27	0.00933813	0.849574	0.891916	415	415
C13orf29	0.170681	0.000479047	0.00153911	415	415
C13orf30	-0.11885	0.0154165	0.0328003	415	374
C13orf31	-0.101935	0.0379204	0.0711646	415	415
C13orf33	-0.128268	0.00889781	0.0203067	415	415
C13orf34	0.0789202	0.10841	0.173698	415	415
C13orf35	0.0986476	0.0445961	0.081825	415	203
C13orf36	-0.258823	8.88707e-08	7.6226e-07	415	199
C13orf37	0.0443741	0.367223	0.469801	415	415
C13orf38	-0.221051	5.46949e-06	2.92957e-05	415	309
C13orf39	-0.101002	0.0397219	0.0739534	415	99
C14orf101	-0.16183	0.000937564	0.0027861	415	415
C14orf102	-0.164986	0.00074076	0.00226027	415	415
C14orf104	0.00299268	0.951533	0.967122	415	415
C14orf105	0.0631399	0.199261	0.287308	415	344
C14orf106	-0.244814	4.43558e-07	3.14e-06	415	415
C14orf109	0.103414	0.0352038	0.0667225	415	415
C14orf115	-0.04608	0.349074	0.451148	415	374
C14orf118	-0.322156	1.77906e-11	4.09614e-10	415	415
C14orf119	0.0613971	0.211972	0.301975	415	415
C14orf126	-0.0305935	0.53427	0.628014	415	415
C14orf128	0.0866773	0.0777747	0.131499	415	415
C14orf129	0.141082	0.00397907	0.0100445	415	415
C14orf132	-0.193146	7.48969e-05	0.000298716	415	415
C14orf135	-0.265634	3.9278e-08	3.68533e-07	415	415
C14orf138	-0.119781	0.0146242	0.0313752	415	415
C14orf139	-0.299397	4.84245e-10	7.59214e-09	415	415
C14orf142	0.0282653	0.565842	0.656352	415	415
C14orf143	0.0559803	0.255179	0.350826	415	415
C14orf145	-0.31917	2.78921e-11	6.04627e-10	415	415
C14orf147	0.0560166	0.254871	0.350522	415	415
C14orf148	-0.0840347	0.0873069	0.144772	415	405
C14orf149	-0.226257	3.22694e-06	1.84729e-05	415	415
C14orf153	0.0616991	0.209729	0.299243	415	415
C14orf156	0.144602	0.00315306	0.00816895	415	415
C14orf159	-0.205604	2.43199e-05	0.000109768	415	415
C14orf162	-0.0105915	0.829674	0.876935	415	229
C14orf165	0.0399025	0.417511	0.519928	415	73
C14orf166B	-0.023714	0.630019	0.712886	415	213
C14orf166	-0.0938784	0.0560173	0.0994862	415	415
C14orf167	0.013283	0.78732	0.844035	415	415
C14orf169	-0.00273454	0.955709	0.970099	415	415
C14orf174	-0.147114	0.00266234	0.00703131	415	413
C14orf176	0.280682	5.95435e-09	7.02606e-08	415	415
C14orf177	0.0396854	0.420051	0.522384	415	36
C14orf178	-0.0847701	0.0845644	0.140871	415	314
C14orf179	0.157076	0.00132648	0.00379786	415	415
C14orf180	0.000945366	0.984681	0.99048	415	137
C14orf181	0.055245	0.261485	0.357662	415	415
C14orf182	0.0334765	0.49644	0.594464	415	410
C14orf183	0.0356629	0.46873	0.569099	415	209
C14orf184	0.115368	0.0187236	0.0388395	415	400
C14orf19	0.0411401	0.403203	0.506225	415	415
C14orf1	0.33717	1.71838e-12	5.16409e-11	415	415
C14orf21	-0.0810777	0.0990632	0.161135	415	415
C14orf23	0.0315791	0.521176	0.616706	415	113
C14orf28	-0.204839	2.61111e-05	0.000116836	415	415
C14orf2	0.182625	0.000183558	0.000658939	415	415
C14orf33	-0.0401457	0.414676	0.517099	415	415
C14orf34	0.219043	6.68122e-06	3.48267e-05	415	389
C14orf37	-0.14149	0.0038744	0.00980722	415	415
C14orf39	-0.28178	5.1649e-09	6.20309e-08	415	155
C14orf43	-0.183485	0.000170902	0.000618889	415	415
C14orf45	-0.138485	0.00470938	0.011624	415	415
C14orf48	0.0221258	0.65312	0.733437	415	72
C14orf49	-0.227207	2.92694e-06	1.69135e-05	415	415
C14orf4	-0.197767	4.97469e-05	0.000207493	415	415
C14orf50	0.164284	0.000780907	0.00236935	415	412
C14orf53	0.0916796	0.0620477	0.108453	415	149
C14orf64	-0.221917	5.01422e-06	2.72125e-05	415	412
C14orf68	0.147756	0.00254851	0.00676603	415	332
C14orf70	0.00667206	0.892207	0.924526	415	71
C14orf72	0.167201	0.000626273	0.00195103	415	410
C14orf73	0.0406401	0.408948	0.511644	415	415
C14orf79	0.178212	0.000263518	0.000908102	415	415
C14orf80	0.2289	2.45677e-06	1.44484e-05	415	415
C14orf86	-0.163452	0.000831094	0.00250356	415	68
C14orf93	0.0726809	0.139378	0.214791	415	415
C15orf17	-0.115576	0.0185102	0.038444	415	415
C15orf21	0.111584	0.0230028	0.0463425	415	415
C15orf23	0.0260358	0.596889	0.684586	415	415
C15orf24	0.107909	0.0279445	0.0548397	415	415
C15orf26	-0.151899	0.00191495	0.00524184	415	357
C15orf27	-0.0157096	0.749664	0.813497	415	415
C15orf28	-0.116424	0.017661	0.0369115	415	414
C15orf29	-0.0704082	0.152208	0.230575	415	415
C15orf2	-0.0961424	0.0503242	0.0907703	415	182
C15orf32	0.0701826	0.153529	0.232141	415	45
C15orf33	-0.243304	5.24495e-07	3.64033e-06	415	410
C15orf34	0.0444794	0.366086	0.468555	415	413
C15orf37	0.0306407	0.533638	0.627393	415	415
C15orf38	0.00373706	0.939498	0.958591	415	415
C15orf39	0.136202	0.0054488	0.013201	415	415
C15orf40	-0.00345091	0.944123	0.961814	415	415
C15orf41	-0.0693018	0.15877	0.238687	415	415
C15orf42	0.0687685	0.162007	0.242663	415	415
C15orf43	0.0762858	0.12075	0.190675	415	92
C15orf44	0.0656117	0.182198	0.267189	415	415
C15orf48	0.215949	9.06211e-06	4.55583e-05	415	415
C15orf50	-0.0285086	0.562502	0.653368	415	167
C15orf51	-0.228238	2.6313e-06	1.53809e-05	415	381
C15orf52	0.00533608	0.913697	0.94029	415	415
C15orf53	-0.100364	0.0409962	0.0760268	415	323
C15orf54	-0.0267791	0.586453	0.674802	415	347
C15orf55	0.112846	0.0214903	0.0437133	415	376
C15orf56	0.127729	0.00919083	0.0208718	415	399
C15orf57	-0.0367241	0.455593	0.556928	415	415
C15orf58	0.120756	0.0138329	0.0299178	415	415
C15orf59	-0.11968	0.0147082	0.0315321	415	412
C15orf5	-0.0361285	0.462941	0.564001	415	408
C15orf60	-0.017978	0.714988	0.784364	415	154
C15orf61	0.138008	0.00485586	0.0119535	415	415
C15orf62	0.137415	0.00504378	0.0123694	415	415
C15orf63	0.211816	1.35222e-05	6.51932e-05	415	415
C16orf11	0.00153595	0.975114	0.983232	415	185
C16orf13	0.22207	4.93774e-06	2.68456e-05	415	415
C16orf3	0.0214098	0.663645	0.742079	415	394
C16orf42	0.123267	0.0119653	0.0262727	415	415
C16orf45	-0.0832518	0.0903044	0.148948	415	415
C16orf46	-0.0379893	0.440206	0.541654	415	415
C16orf48	0.00537756	0.913028	0.939956	415	415
C16orf52	-0.165495	0.00071285	0.00218379	415	415
C16orf53	0.149618	0.00224336	0.00603673	415	415
C16orf54	-0.282011	5.01205e-09	6.04825e-08	415	415
C16orf55	0.192765	7.7434e-05	0.000307803	415	415
C16orf57	0.154553	0.00158861	0.00444702	415	415
C16orf58	0.339633	1.15687e-12	3.6731e-11	415	415
C16orf59	0.16278	0.000873737	0.00261604	415	415
C16orf5	-0.0793363	0.106555	0.171268	415	415
C16orf61	0.168334	0.000574291	0.00180666	415	415
C16orf62	-0.213368	1.16461e-05	5.70043e-05	415	415
C16orf63	0.0143336	0.770951	0.830226	415	415
C16orf68	-0.161263	0.000977653	0.00289164	415	415
C16orf70	0.114646	0.0194819	0.0401616	415	415
C16orf71	0.0231827	0.637707	0.719854	415	415
C16orf72	-0.0592784	0.228199	0.3212	415	415
C16orf73	-0.0705952	0.15112	0.229322	415	267
C16orf74	0.094155	0.0552942	0.0983661	415	415
C16orf75	0.124153	0.0113624	0.0251317	415	415
C16orf78	-0.0349068	0.478214	0.577874	415	51
C16orf79	-0.10365	0.0347868	0.0661208	415	414
C16orf7	0.164282	0.000781036	0.00236935	415	415
C16orf80	0.00116151	0.981179	0.987998	415	415
C16orf81	-0.0930226	0.058304	0.102945	415	248
C16orf82	-0.00354128	0.942662	0.960761	415	129
C16orf86	-0.181102	0.000208158	0.000735754	415	414
C16orf87	-0.231626	1.84807e-06	1.11975e-05	415	415
C16orf88	0.204885	2.60007e-05	0.000116471	415	415
C16orf89	-0.085439	0.0821307	0.137519	415	404
C16orf90	-0.0222365	0.651499	0.73191	415	182
C16orf91	0.123614	0.0117262	0.0258323	415	415
C16orf92	0.0350506	0.476403	0.576237	415	102
C16orf93	0.10653	0.0300203	0.0583471	415	415
C17orf100	0.156416	0.00139093	0.00395383	415	415
C17orf101	0.038434	0.434869	0.536458	415	415
C17orf102	0.0359848	0.464723	0.565351	415	132
C17orf103	-0.143254	0.00344902	0.00886134	415	415
C17orf104	-0.127691	0.00921181	0.0209101	415	415
C17orf105	0.037738	0.443239	0.544756	415	37
C17orf106	0.255348	1.33609e-07	1.09359e-06	415	415
C17orf107	0.0780421	0.112408	0.179209	415	415
C17orf108	-0.0914241	0.062782	0.109614	415	415
C17orf28	0.378774	1.32019e-15	8.78317e-14	415	415
C17orf37	0.265424	4.0294e-08	3.76593e-07	415	415
C17orf39	-0.250316	2.3862e-07	1.815e-06	415	415
C17orf42	-0.0814044	0.0977052	0.159259	415	415
C17orf44	-0.085919	0.0804194	0.135056	415	415
C17orf46	0.0368724	0.453774	0.555241	415	398
C17orf47	0.0550937	0.262795	0.359075	415	398
C17orf48	-0.226297	3.21366e-06	1.84021e-05	415	415
C17orf49	0.0418608	0.395008	0.498101	415	415
C17orf50	0.188852	0.000108615	0.000414715	415	369
C17orf51	-0.246827	3.54167e-07	2.56555e-06	415	415
C17orf53	0.112426	0.0219838	0.0446076	415	415
C17orf54	0.0807242	0.100549	0.16304	415	125
C17orf55	0.269053	2.58456e-08	2.54368e-07	415	399
C17orf56	0.104865	0.0327036	0.0627483	415	415
C17orf57	-0.156029	0.00143009	0.00405034	415	415
C17orf58	0.0624444	0.204266	0.293019	415	415
C17orf59	0.0796589	0.105134	0.169308	415	415
C17orf60	-0.254997	1.39177e-07	1.13319e-06	415	414
C17orf61	0.110043	0.0249742	0.0497442	415	415
C17orf62	-0.0495718	0.313729	0.41342	415	415
C17orf63	0.17796	0.000268945	0.000924126	415	415
[truncated: 18,227 more rows]
